# Supplementary material for: Identification of optimal reference genes for gene expression studies in a focal cerebral ischaemia model—Spatiotemporal effects
Source: PubMed Central journal article supplement (PMC9097850; doi:10.1111/jcmm.17284), 2022-04-22

CX

HIP

DS

12 h

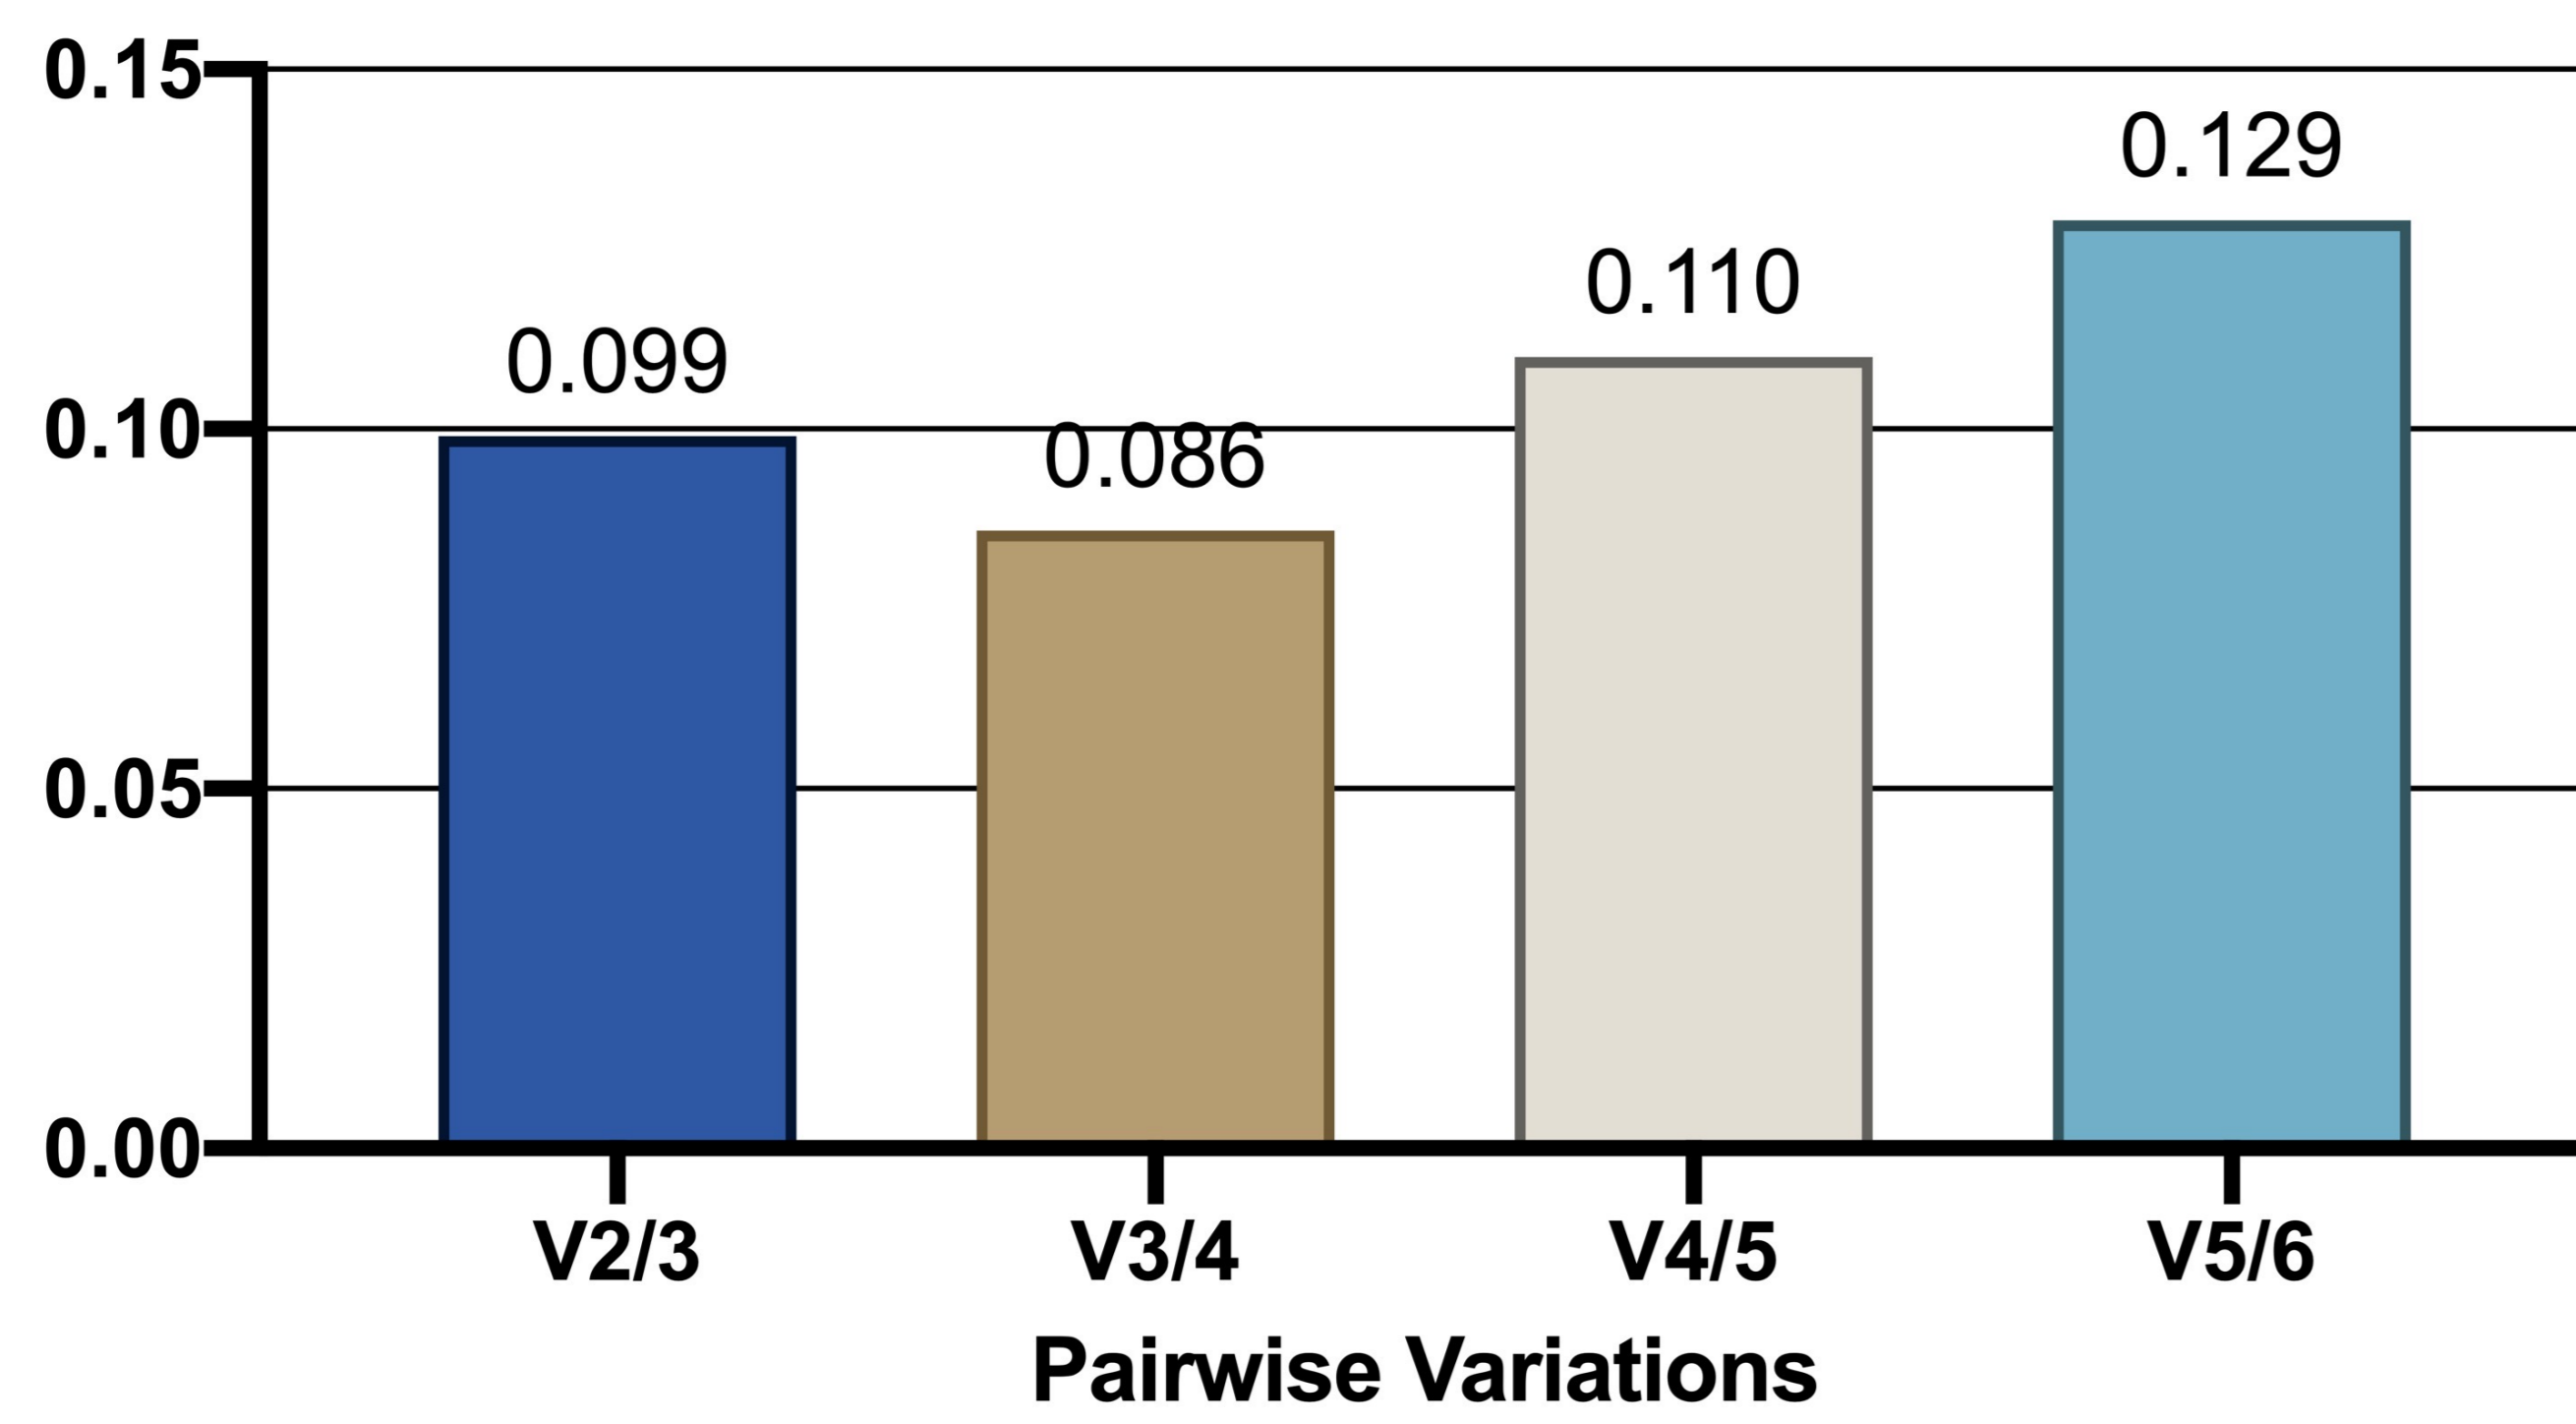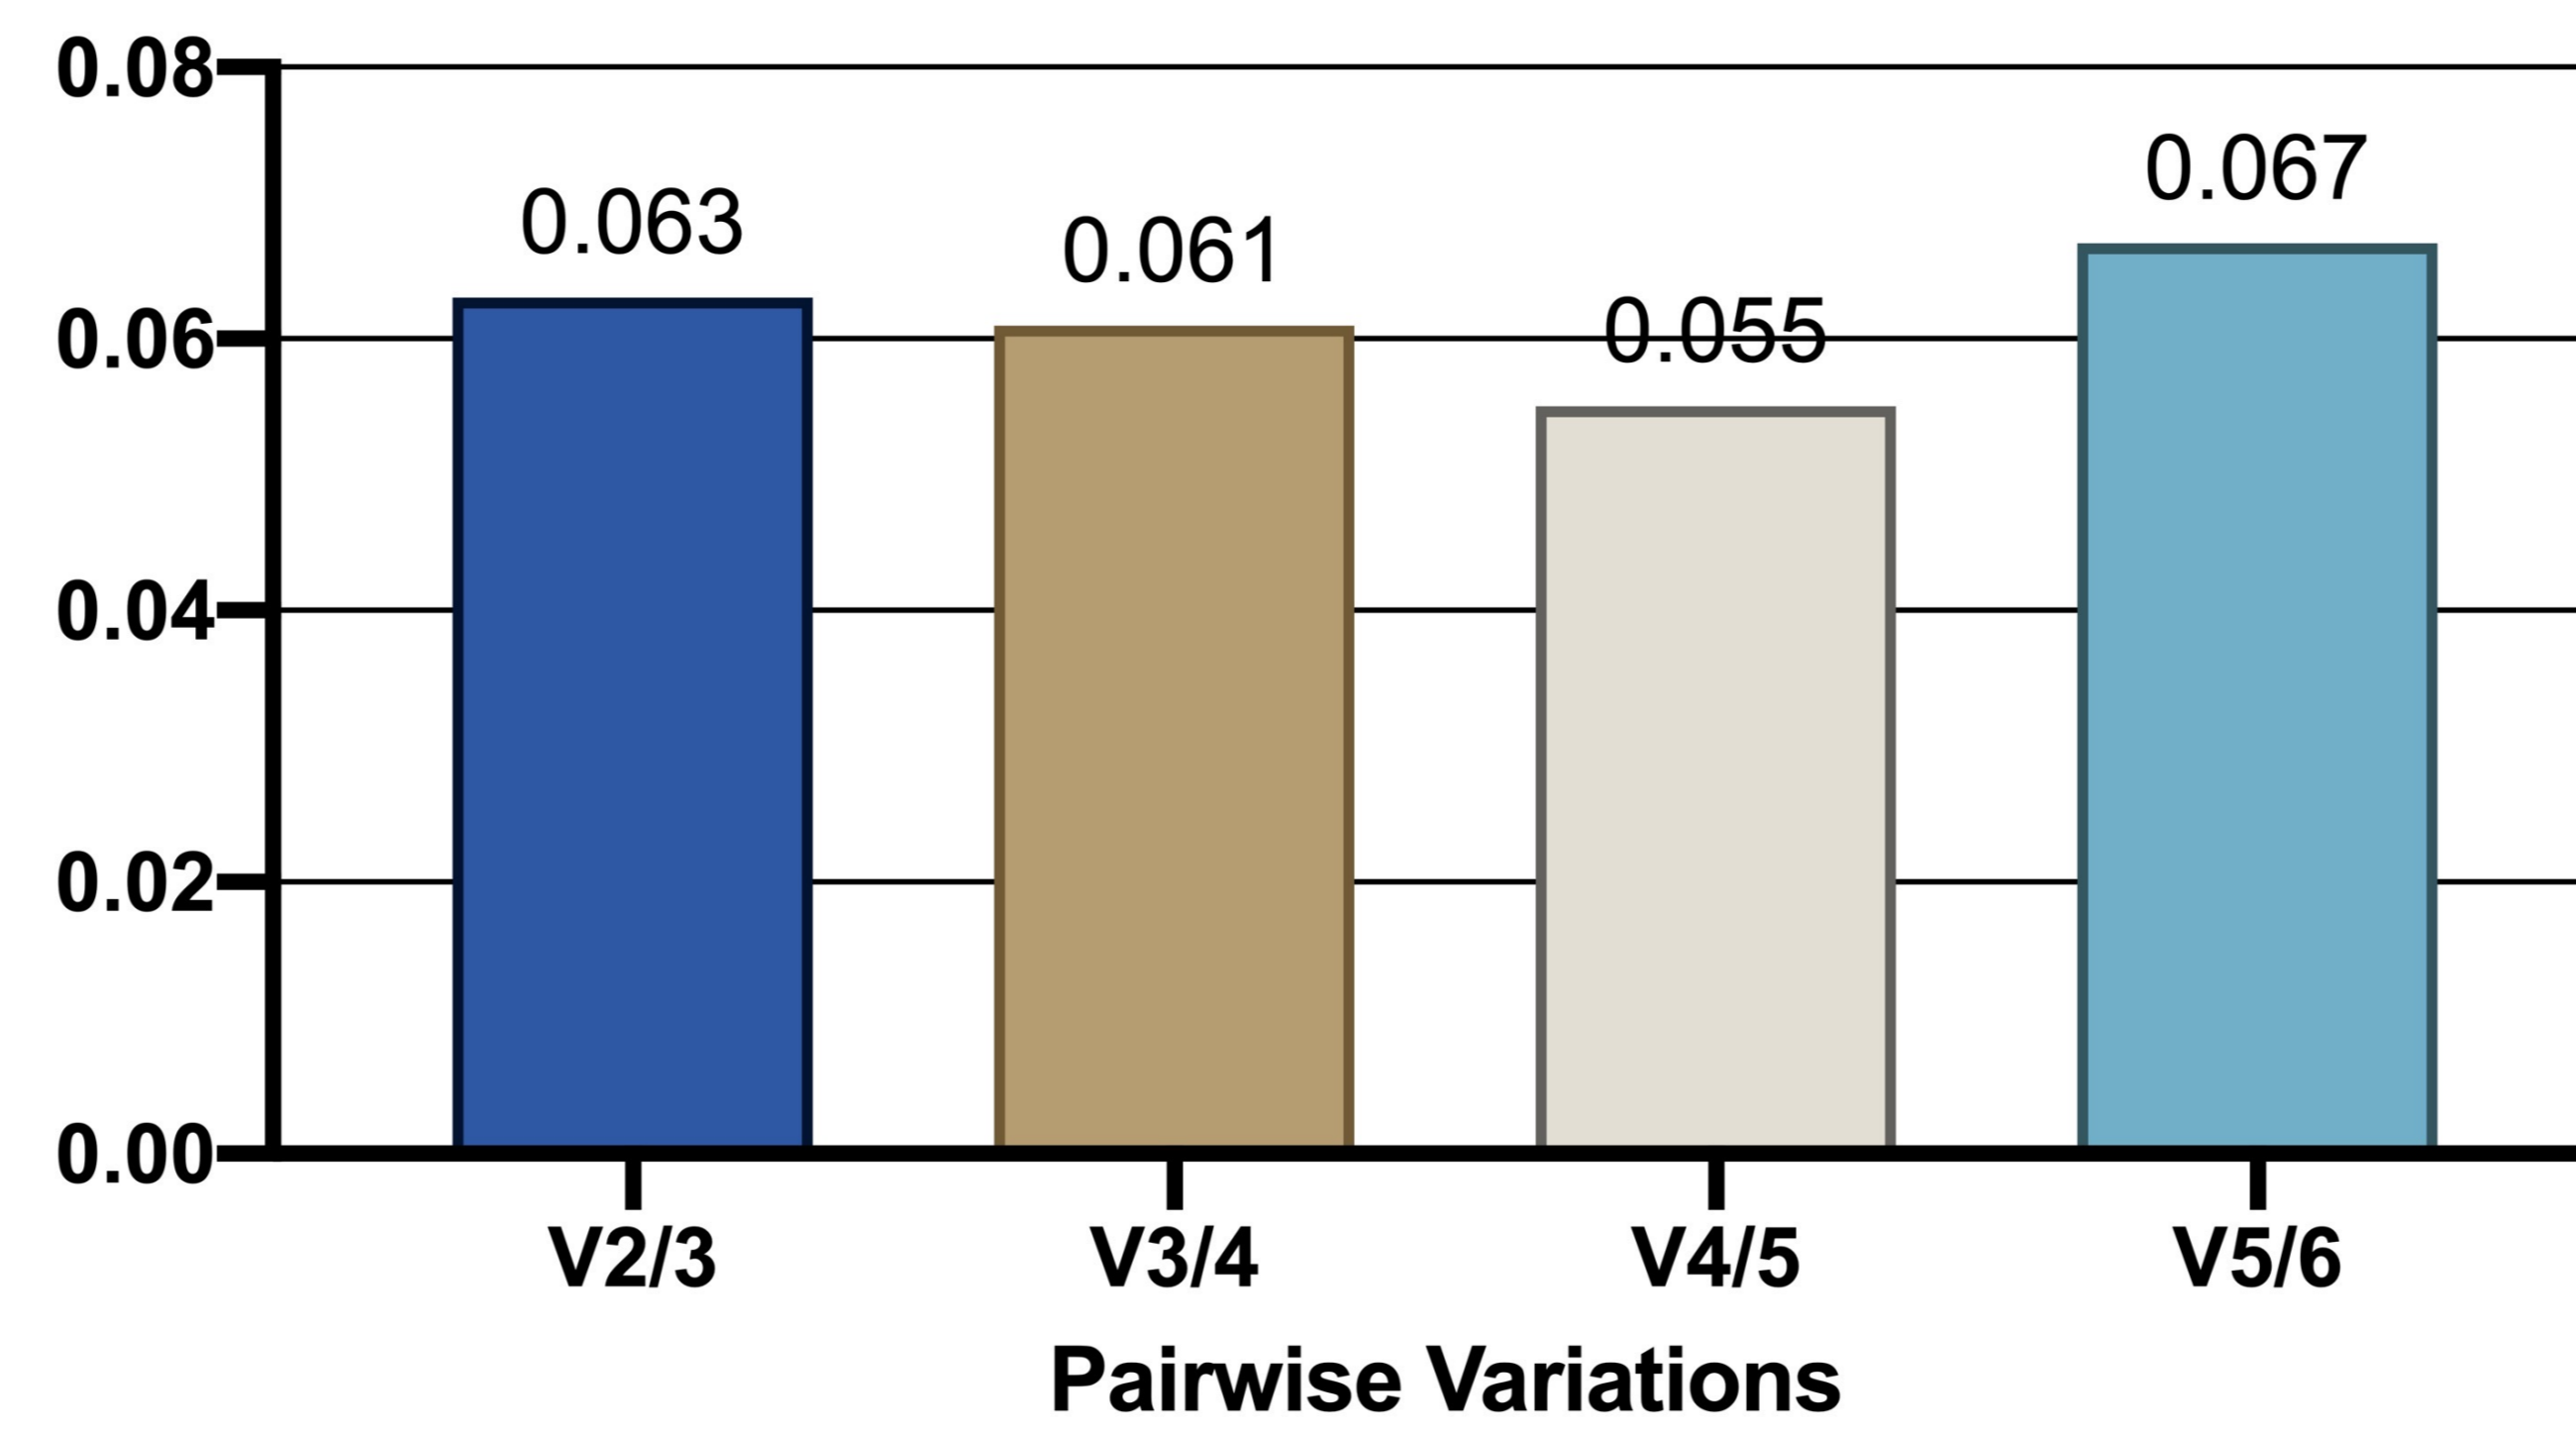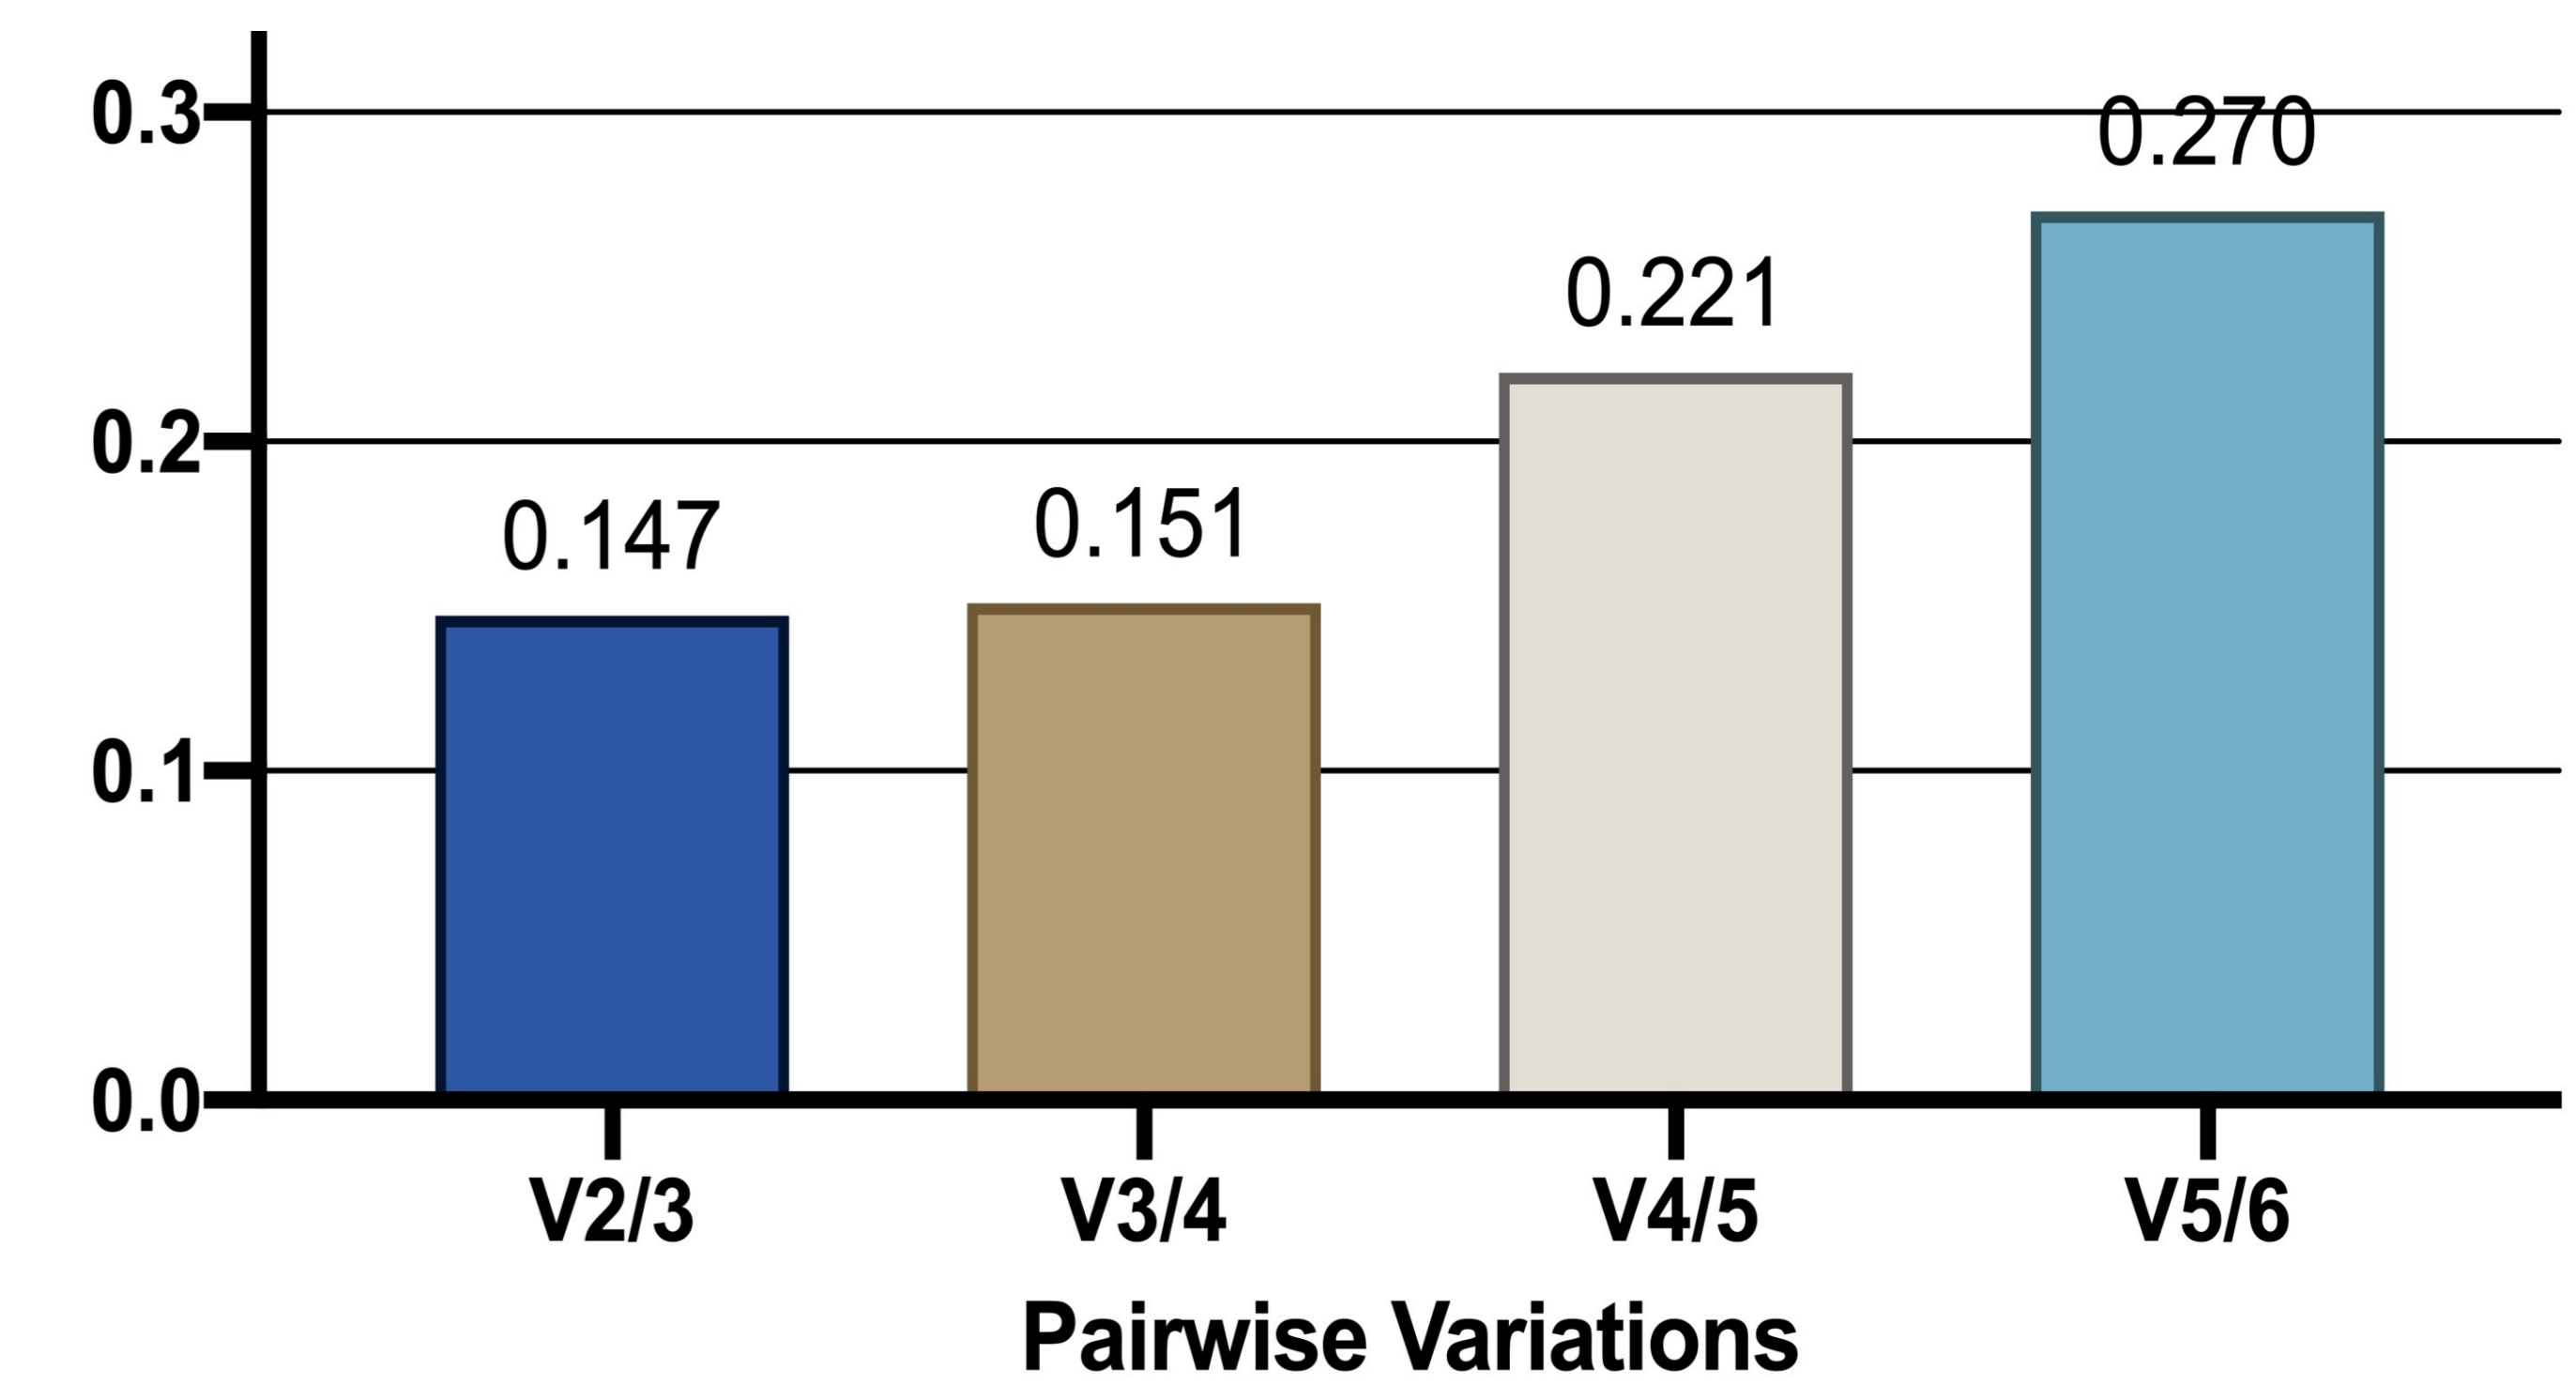

24 h

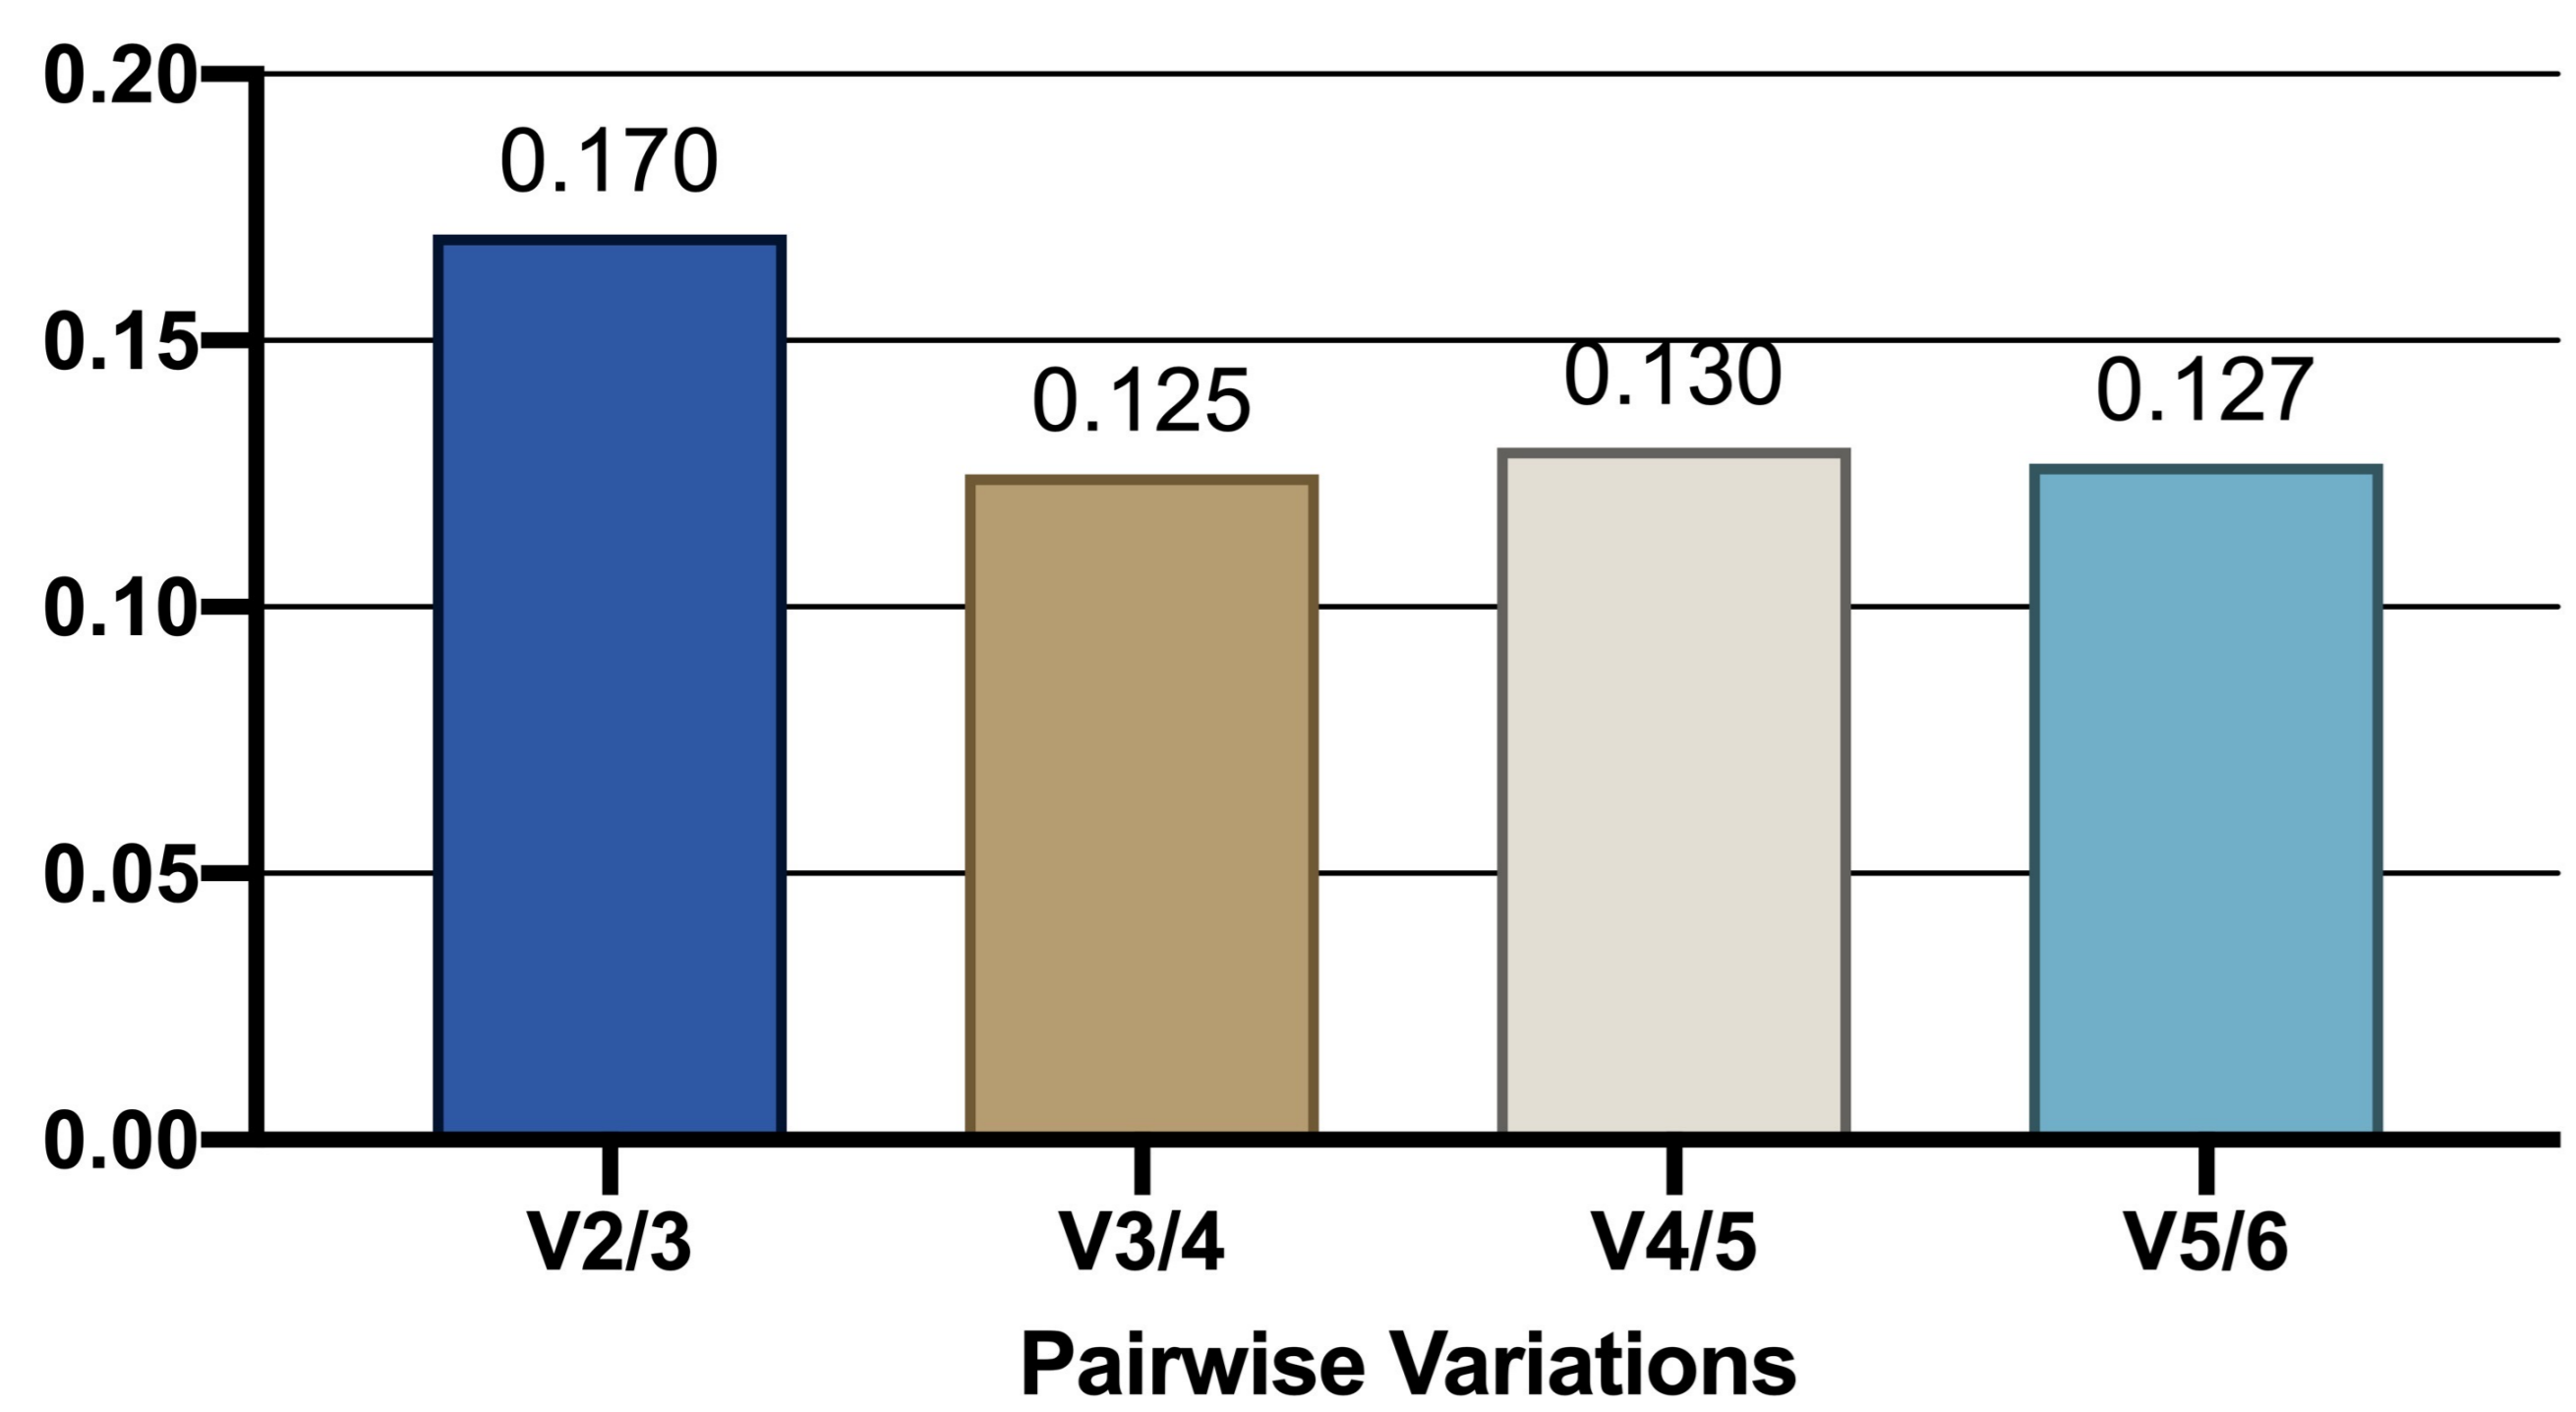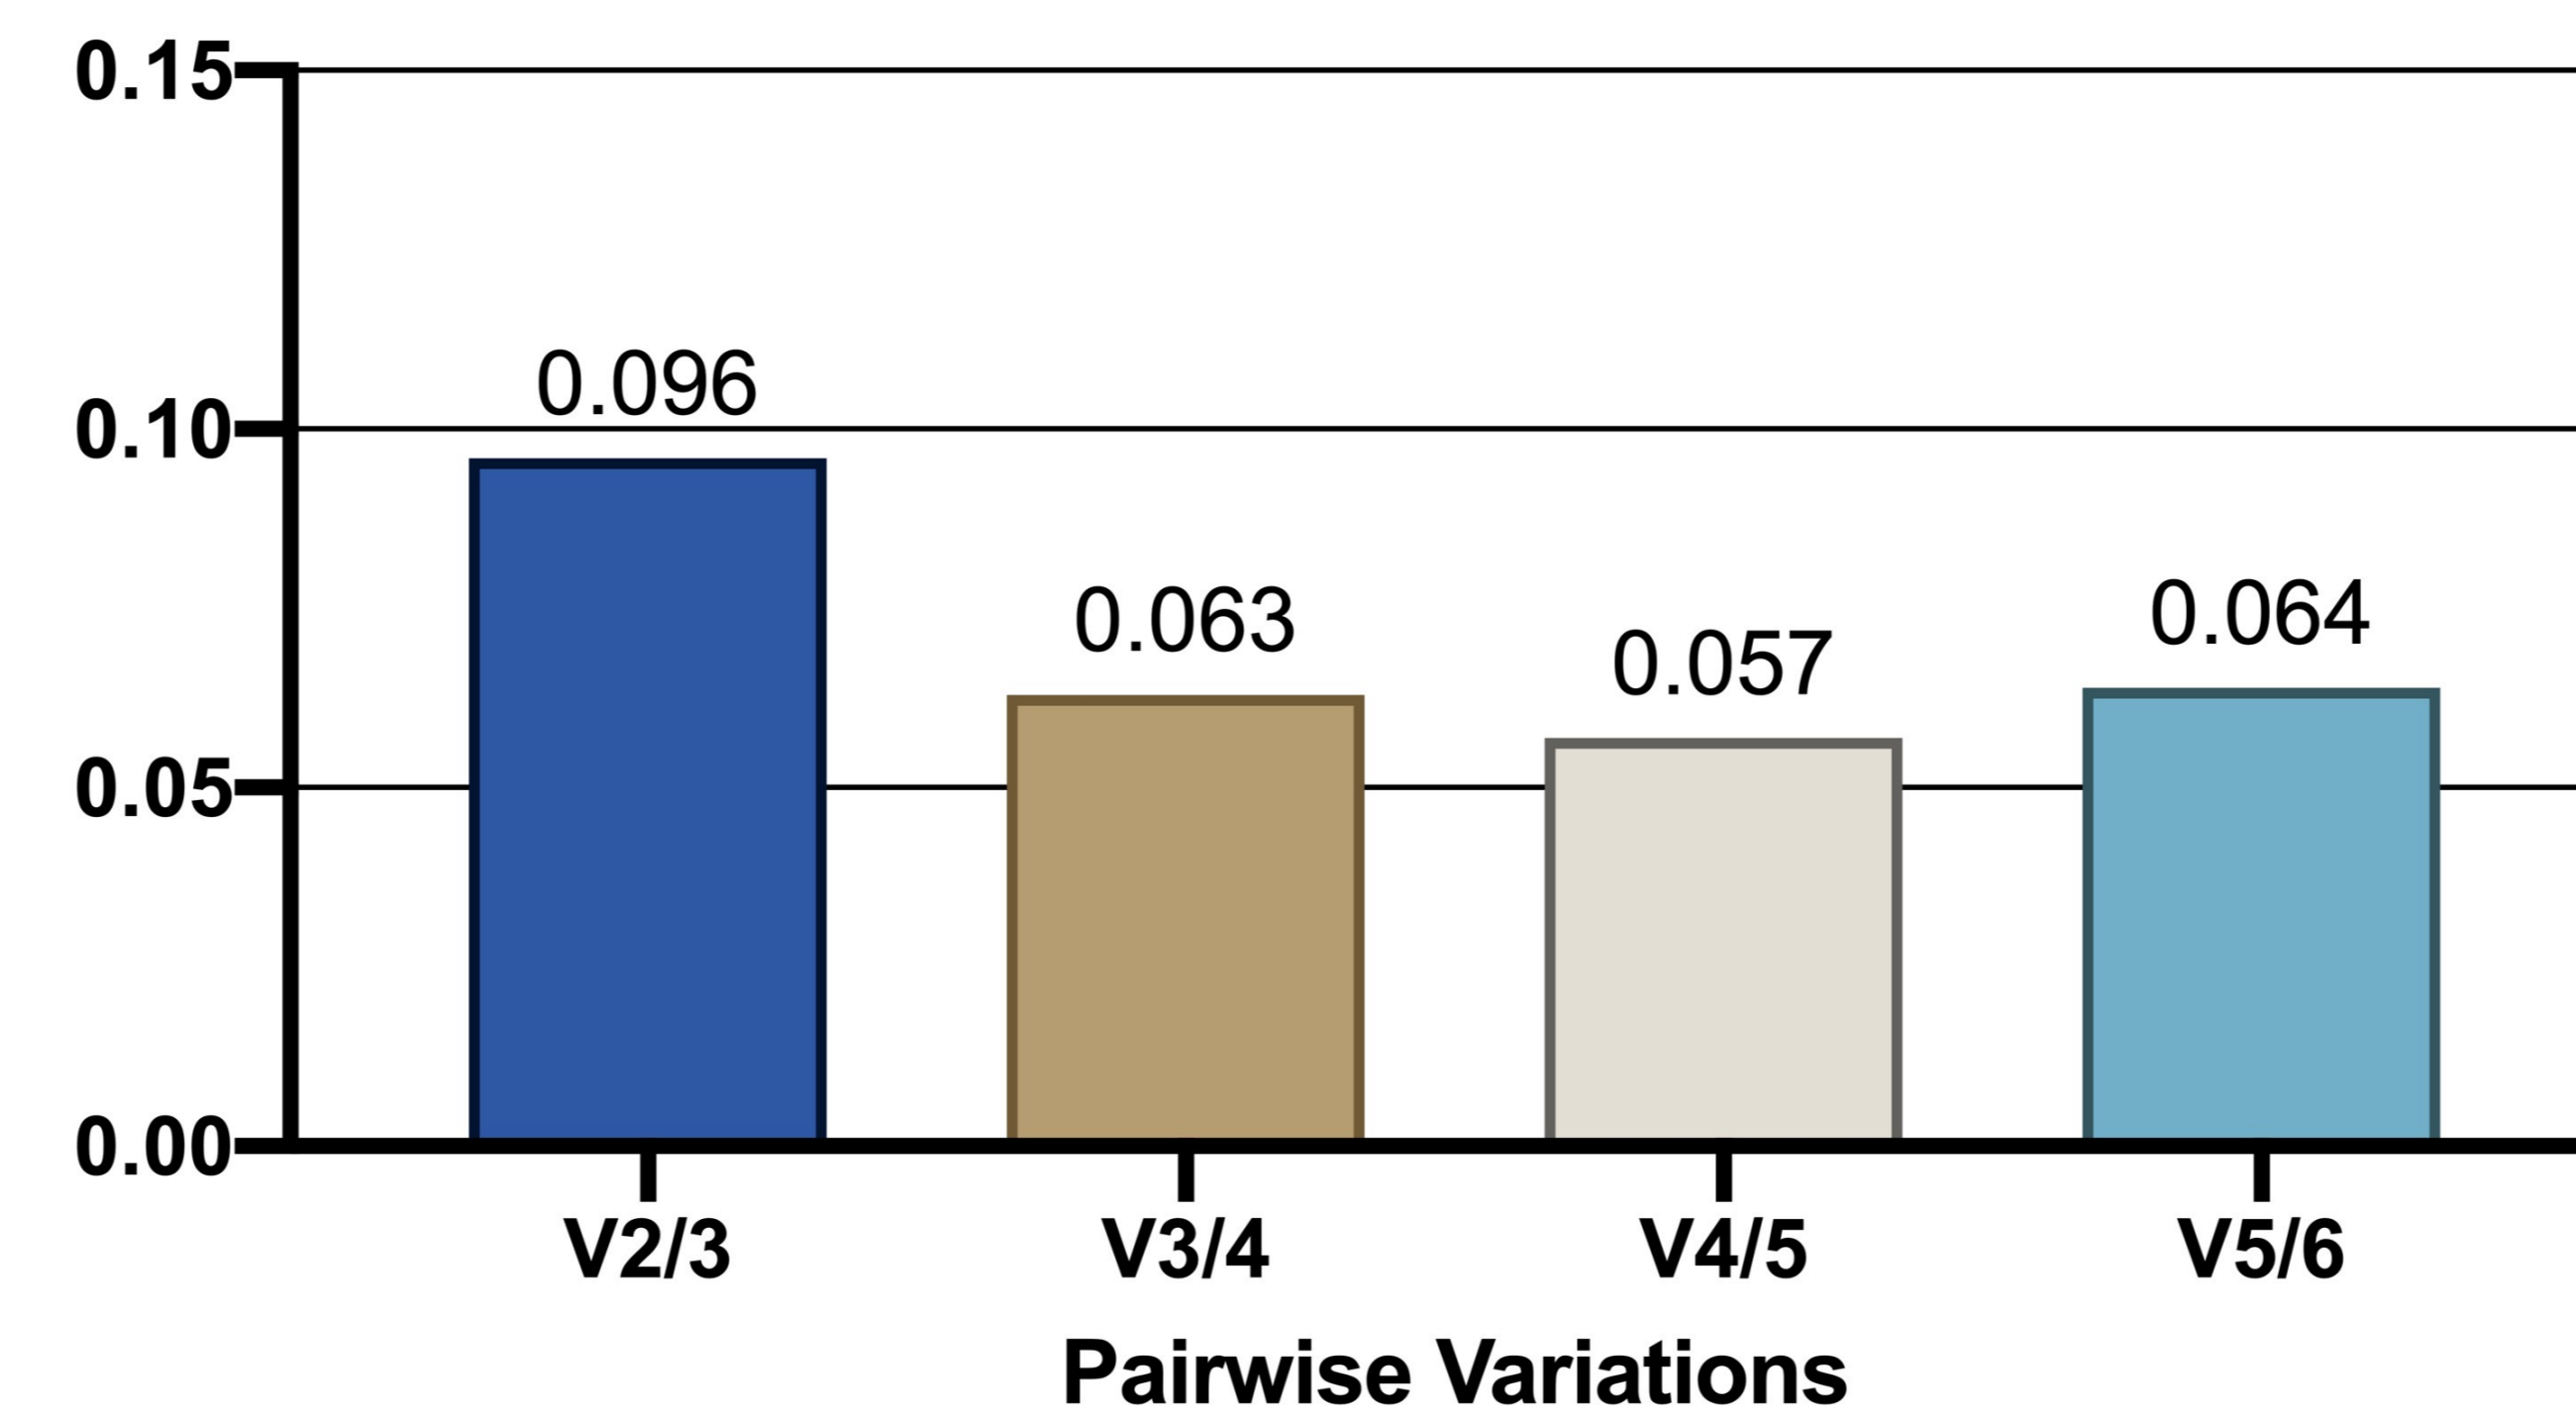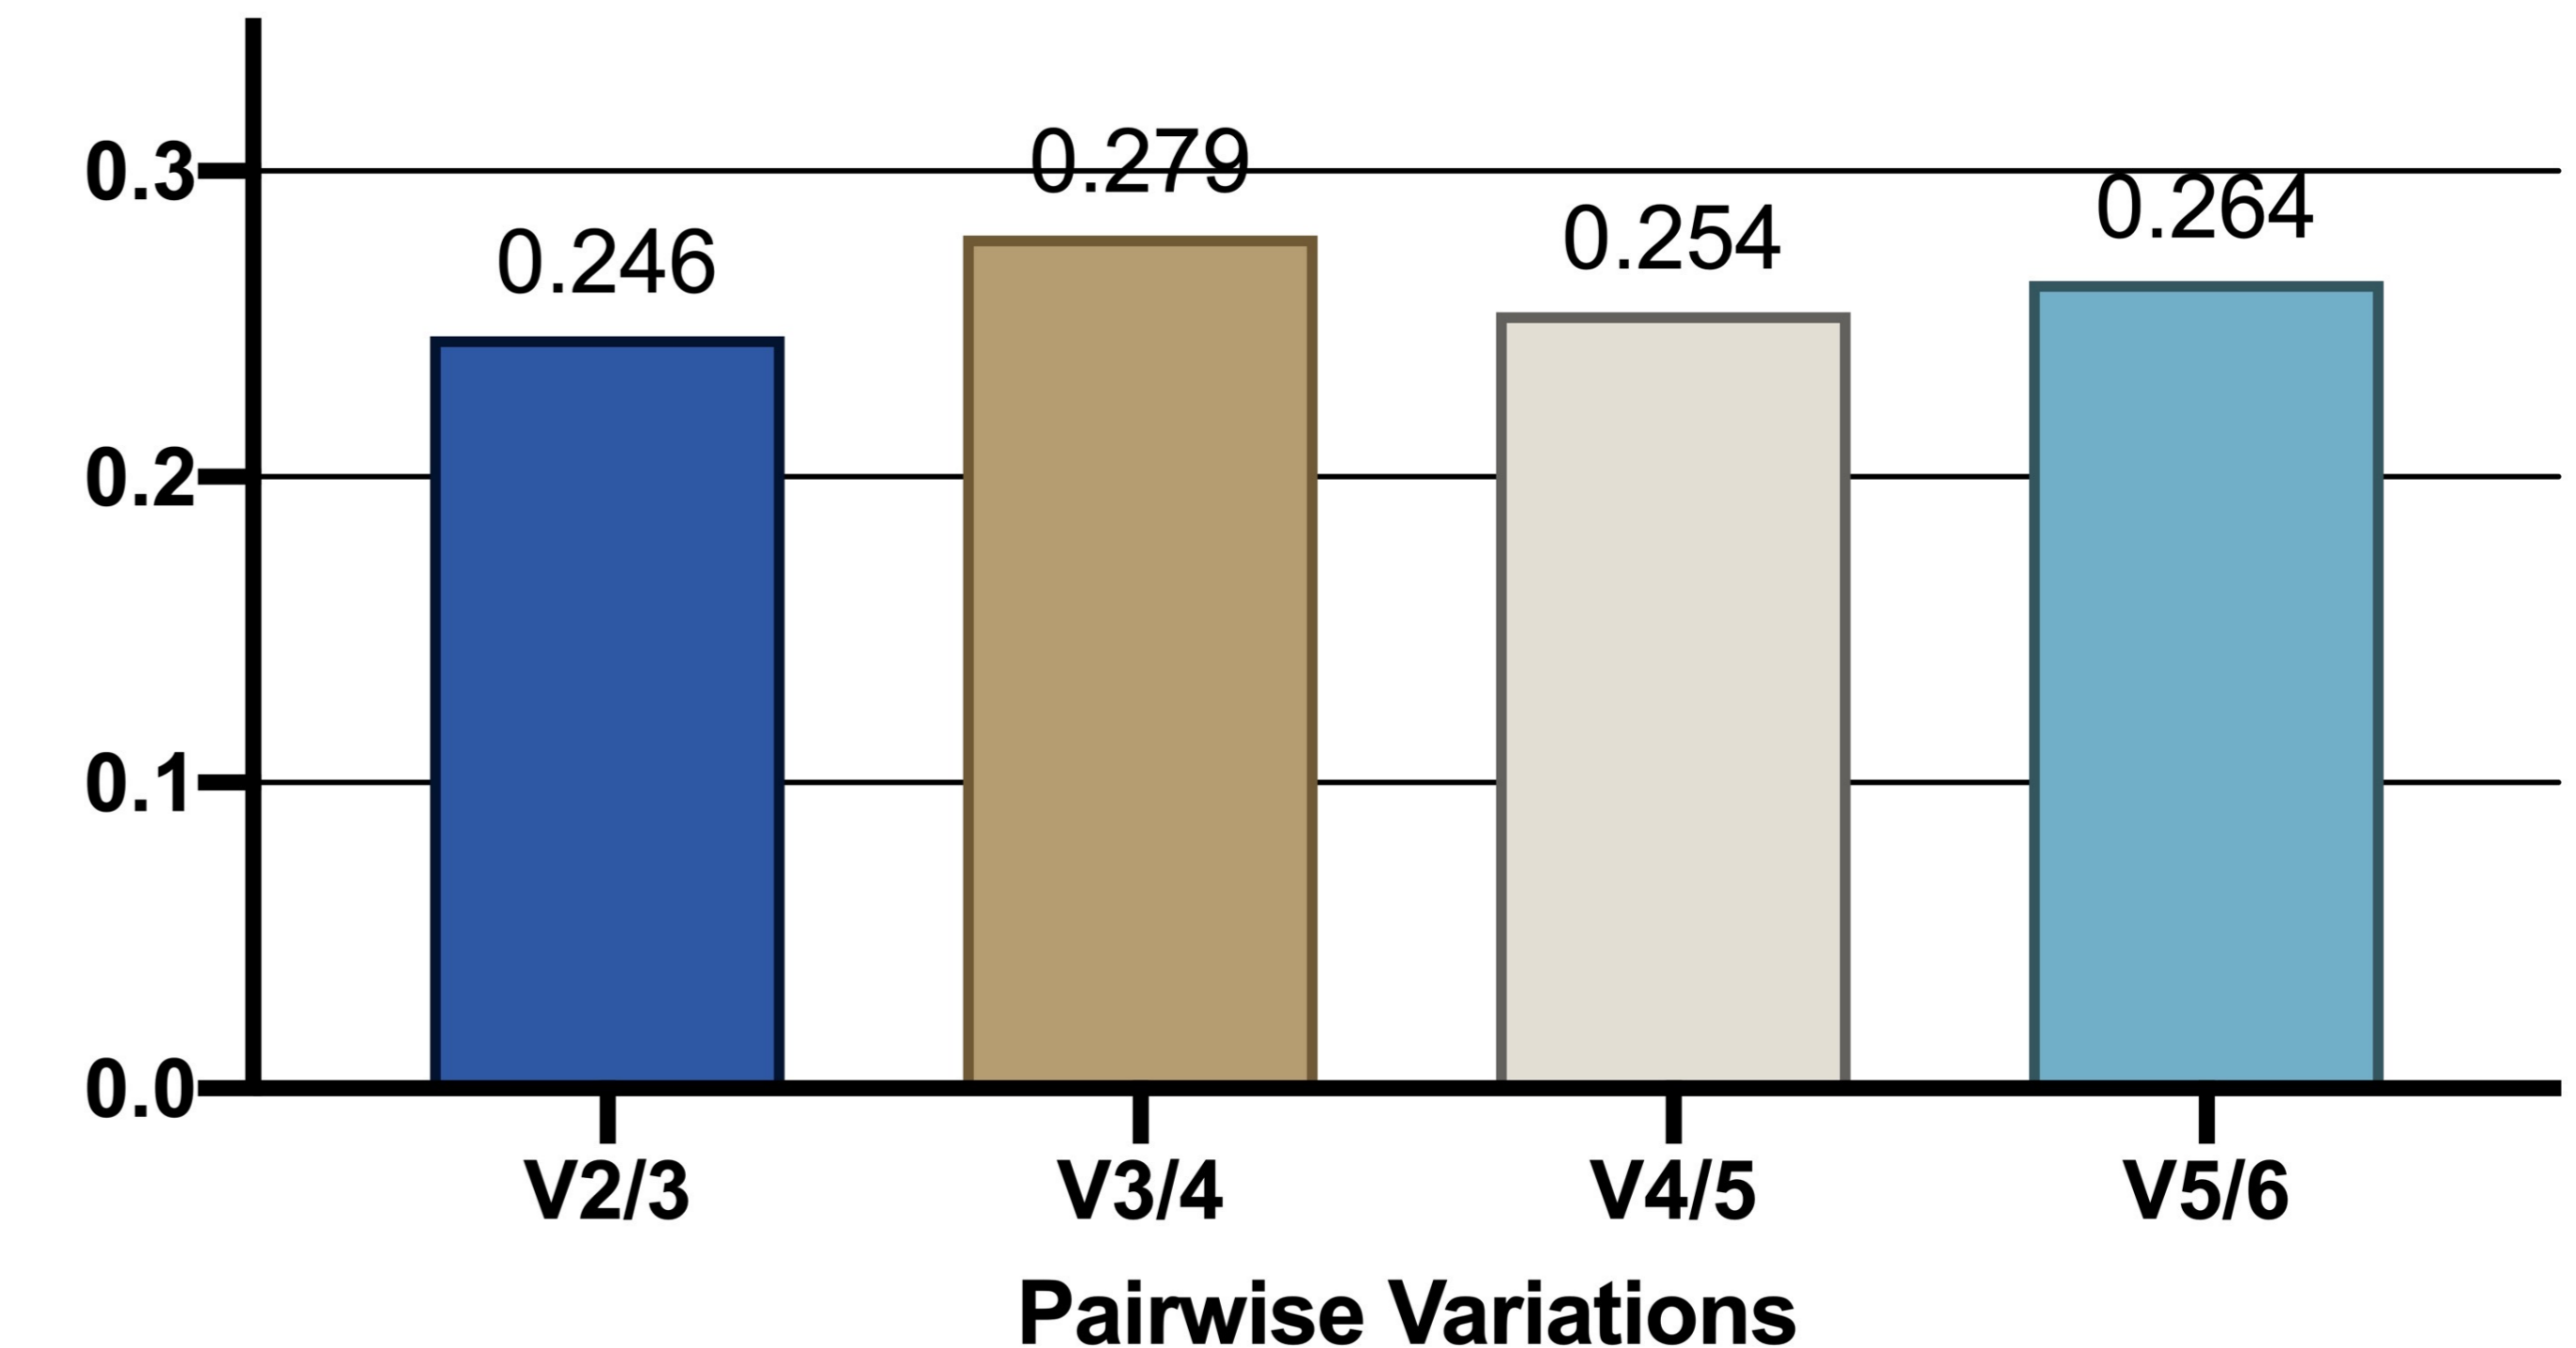

3 d

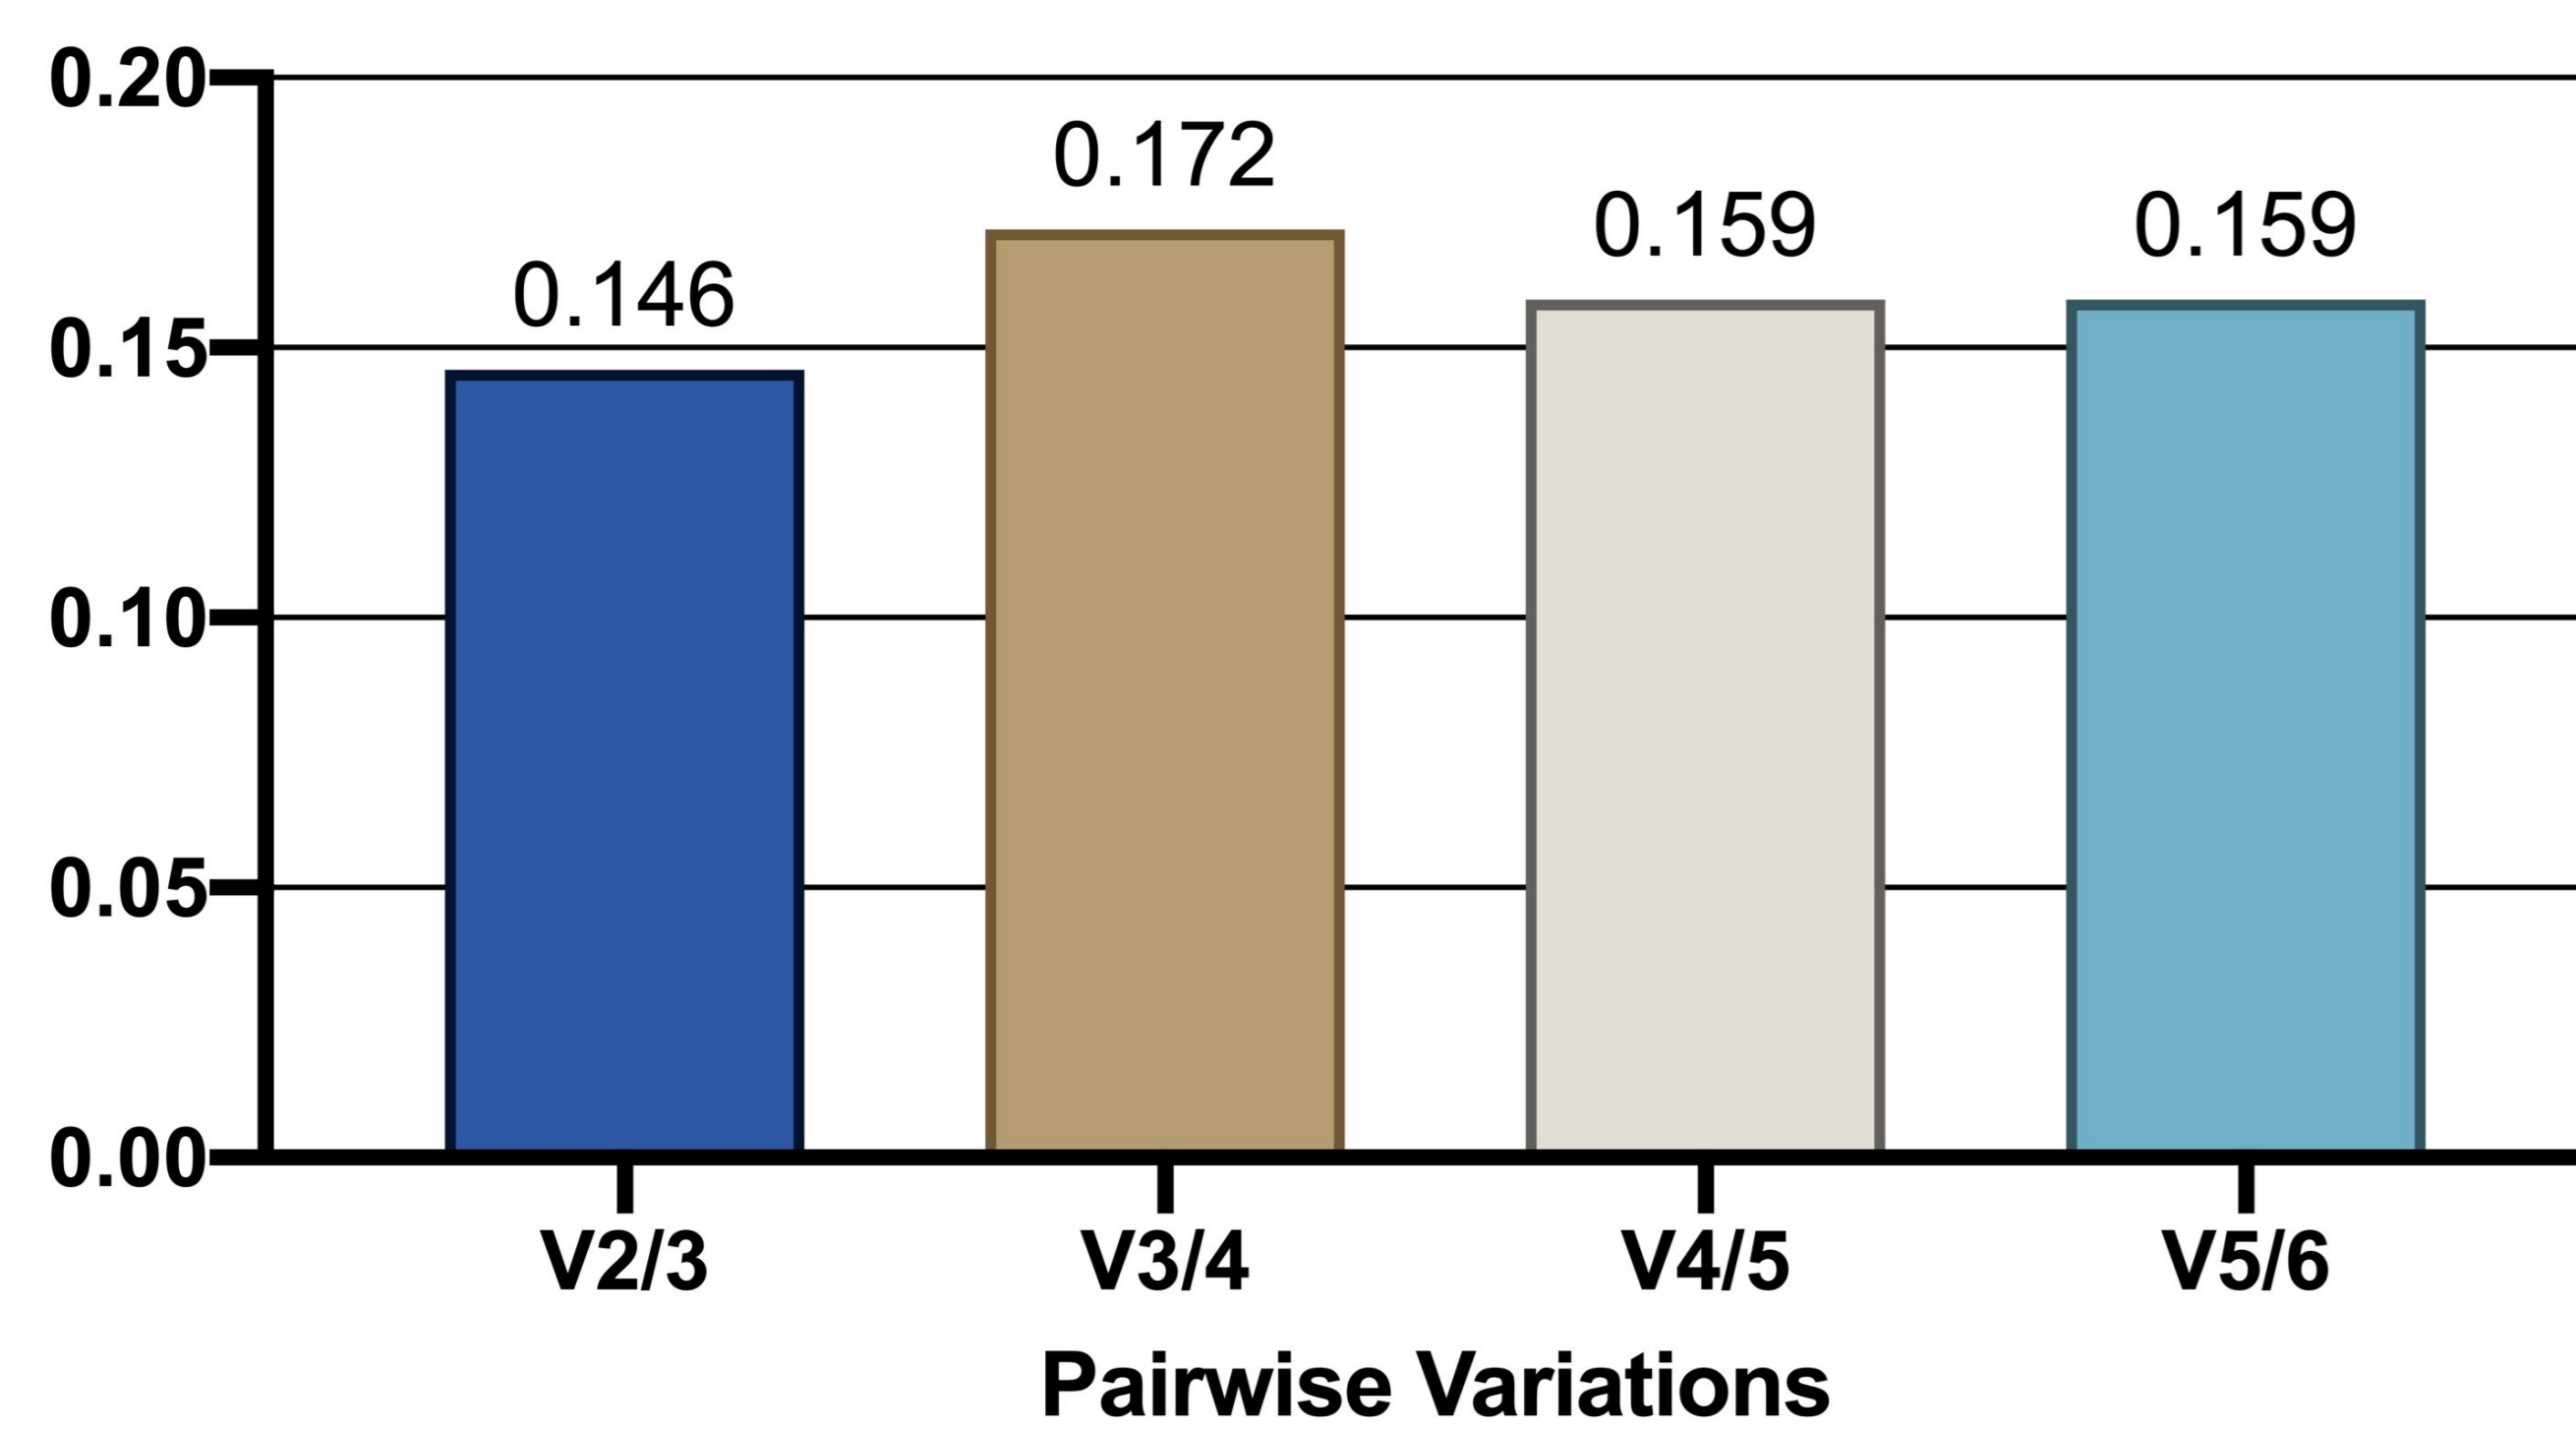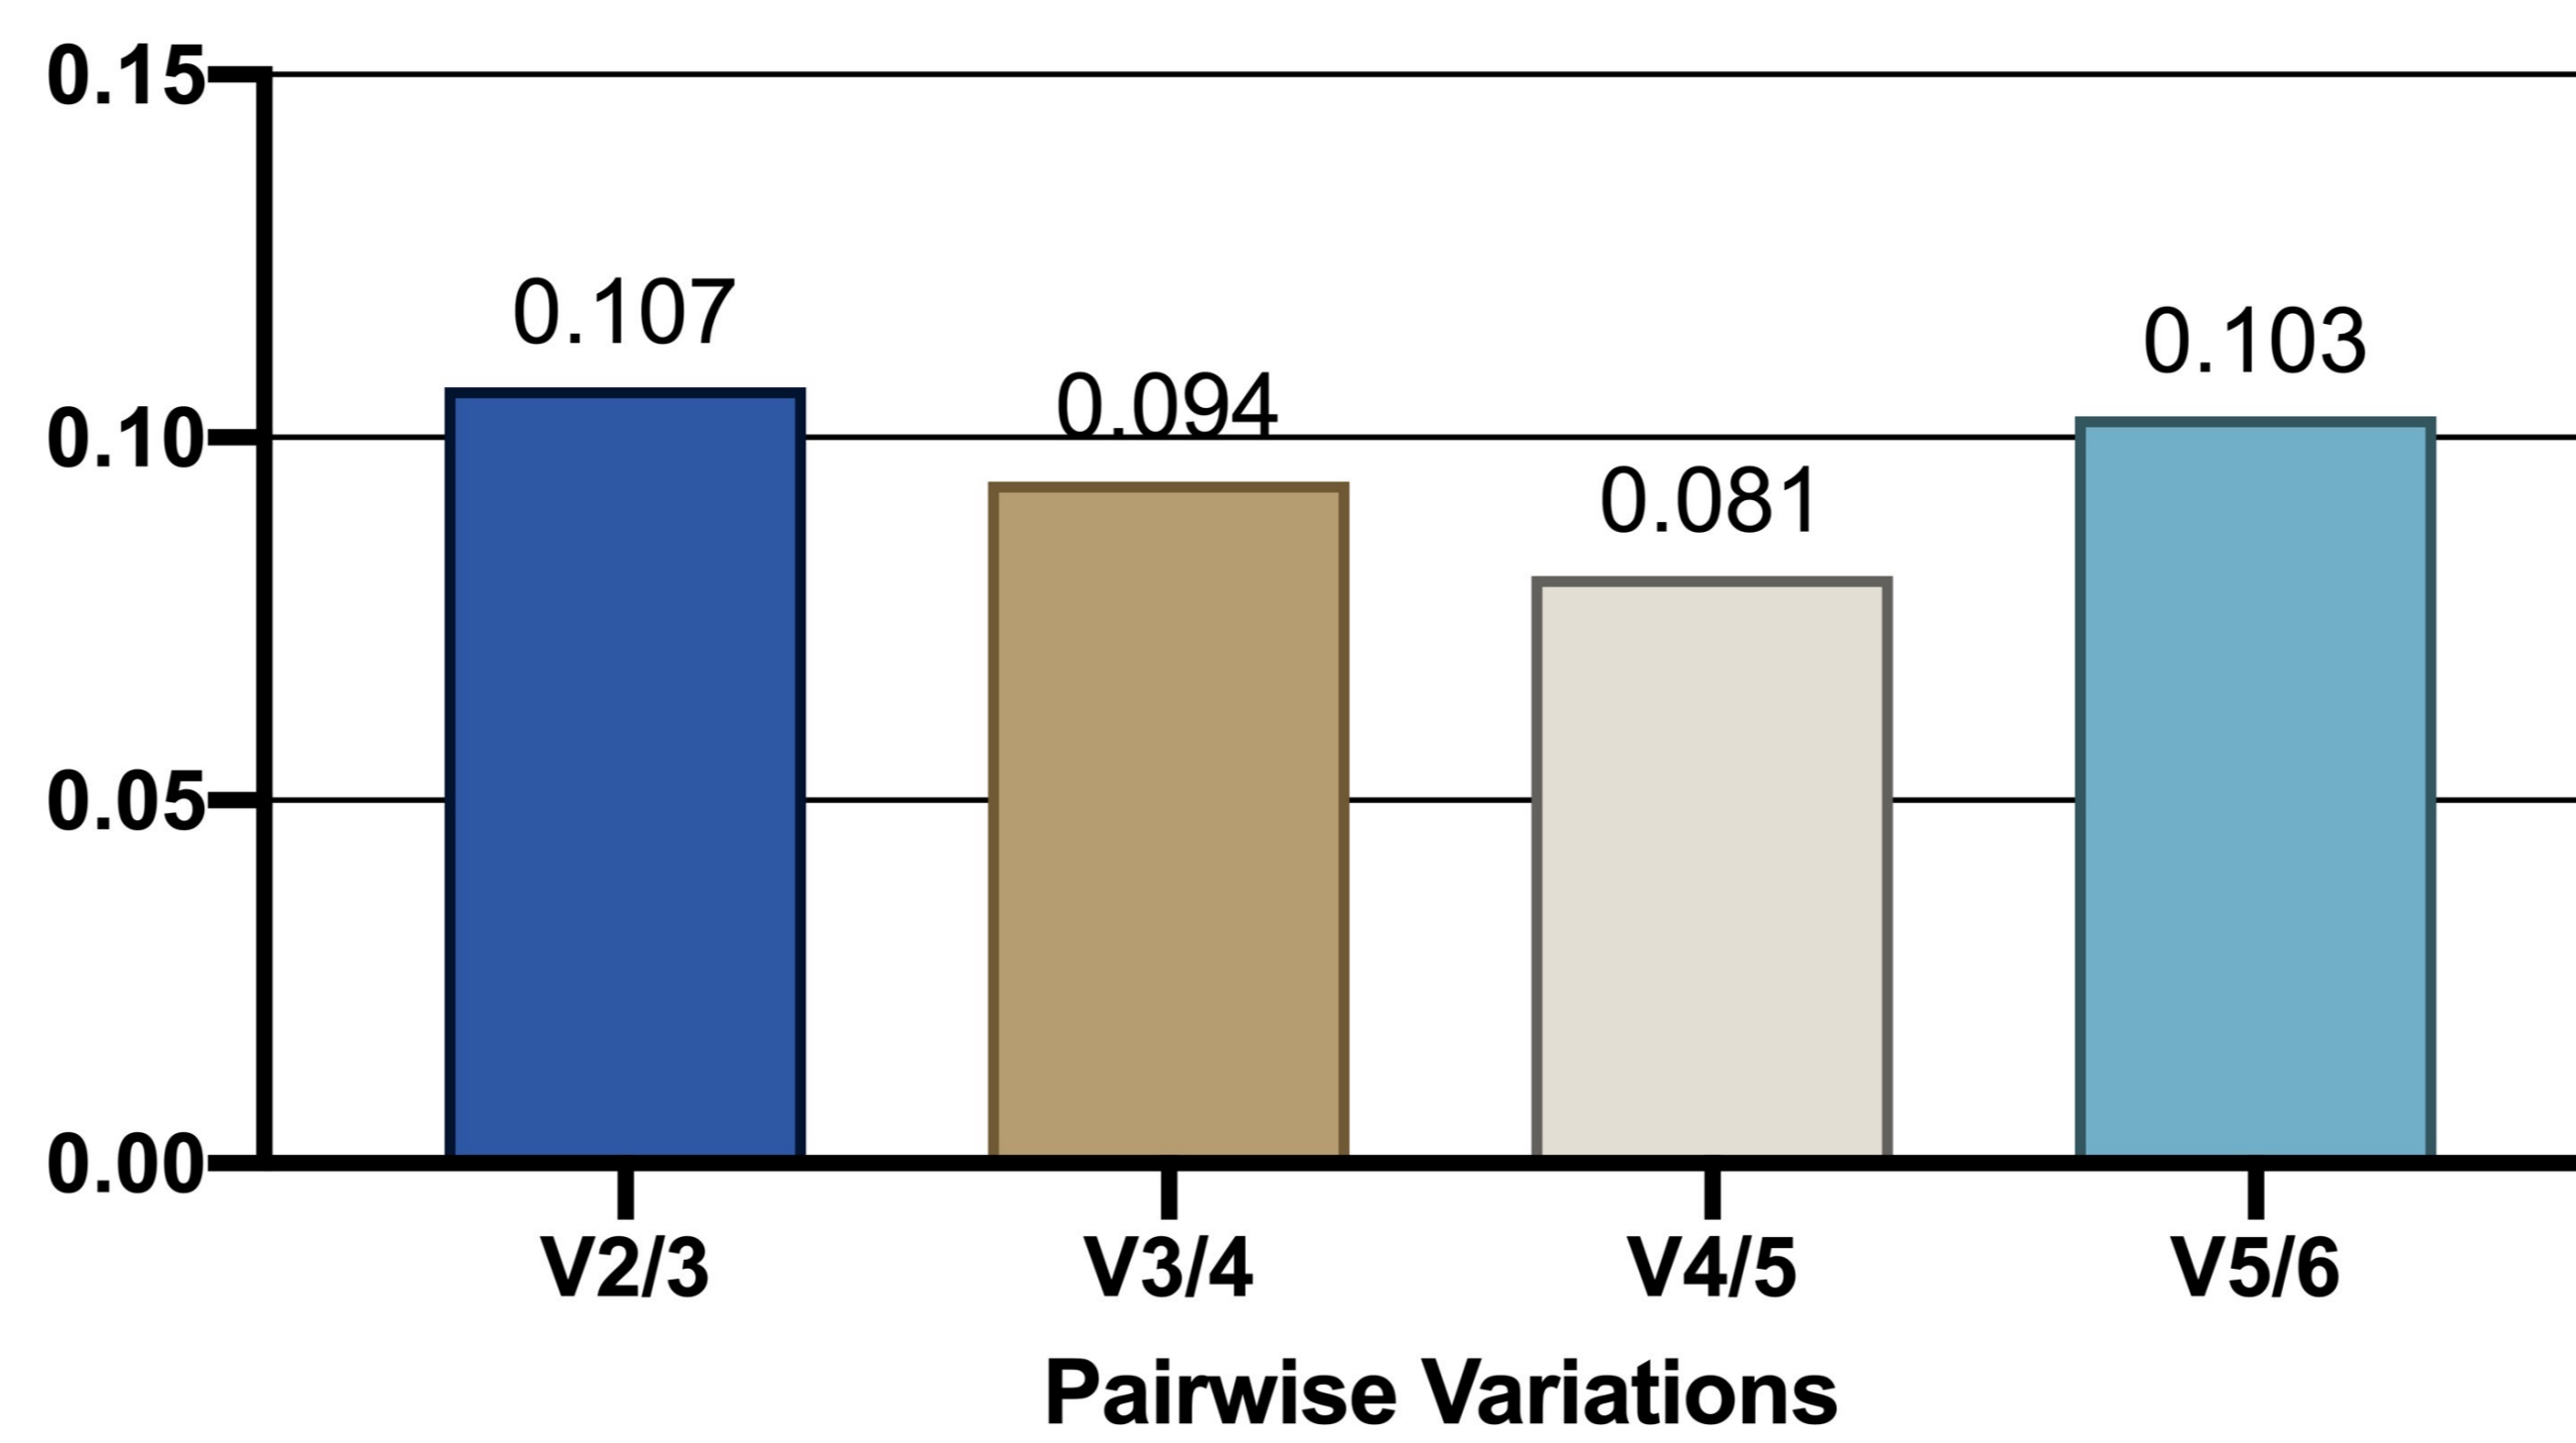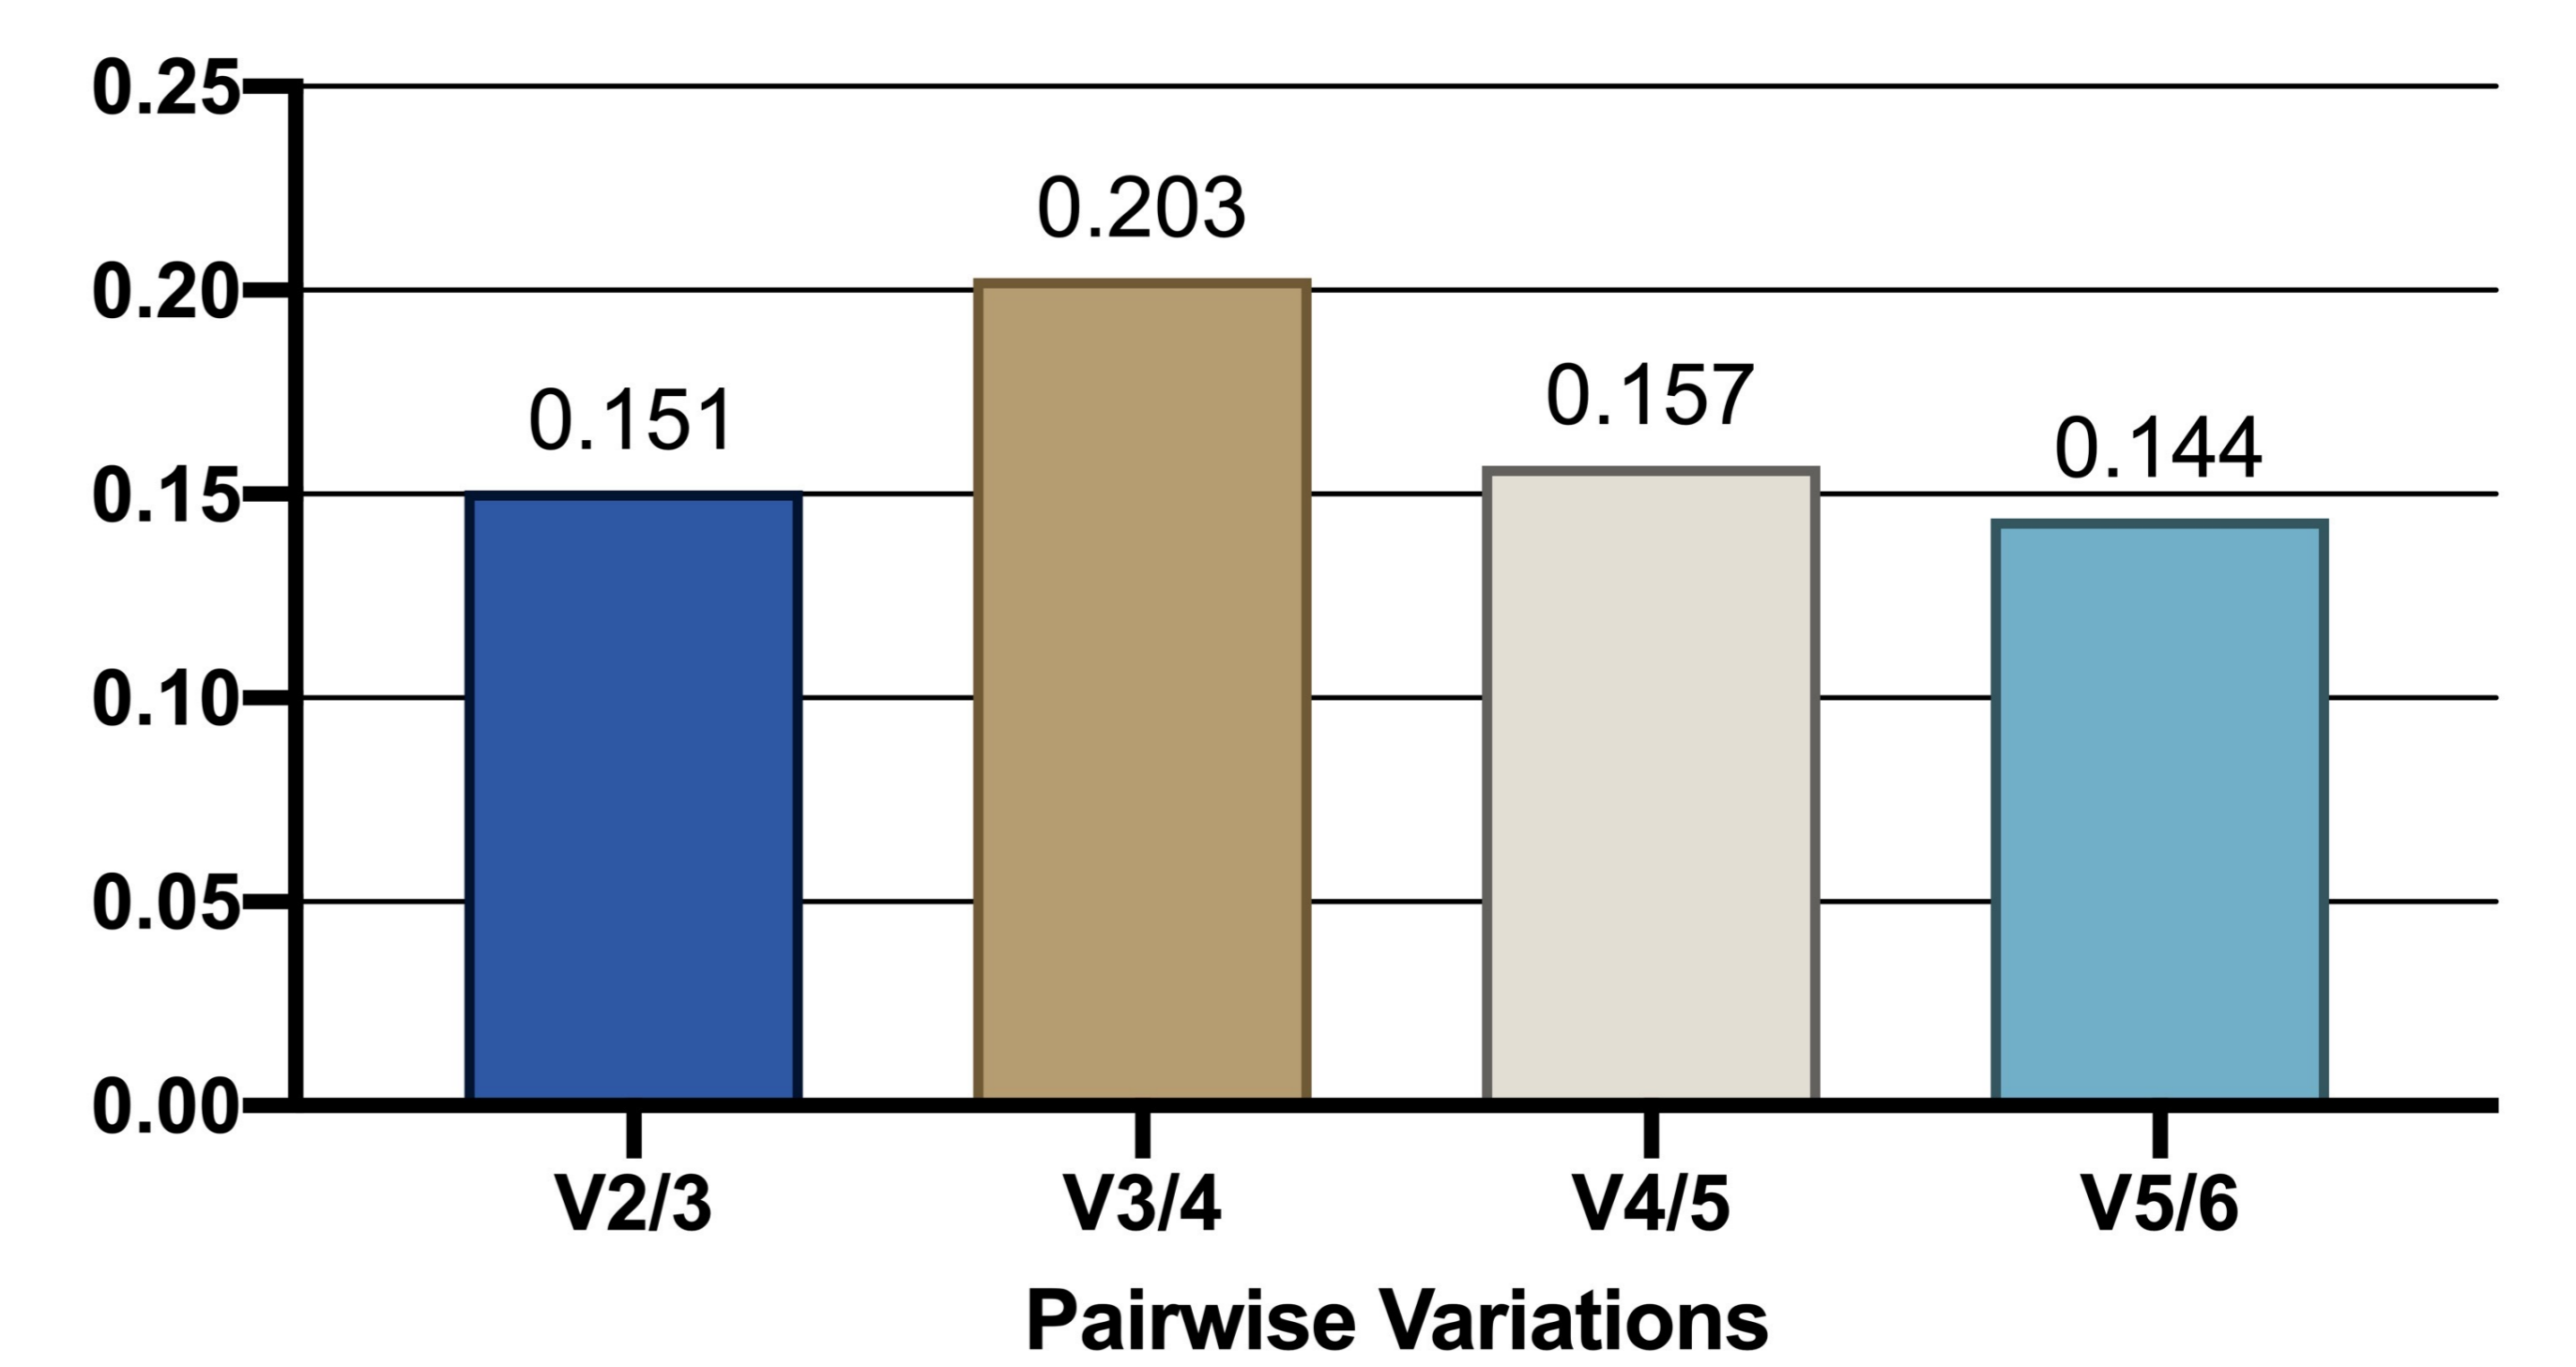

7 d

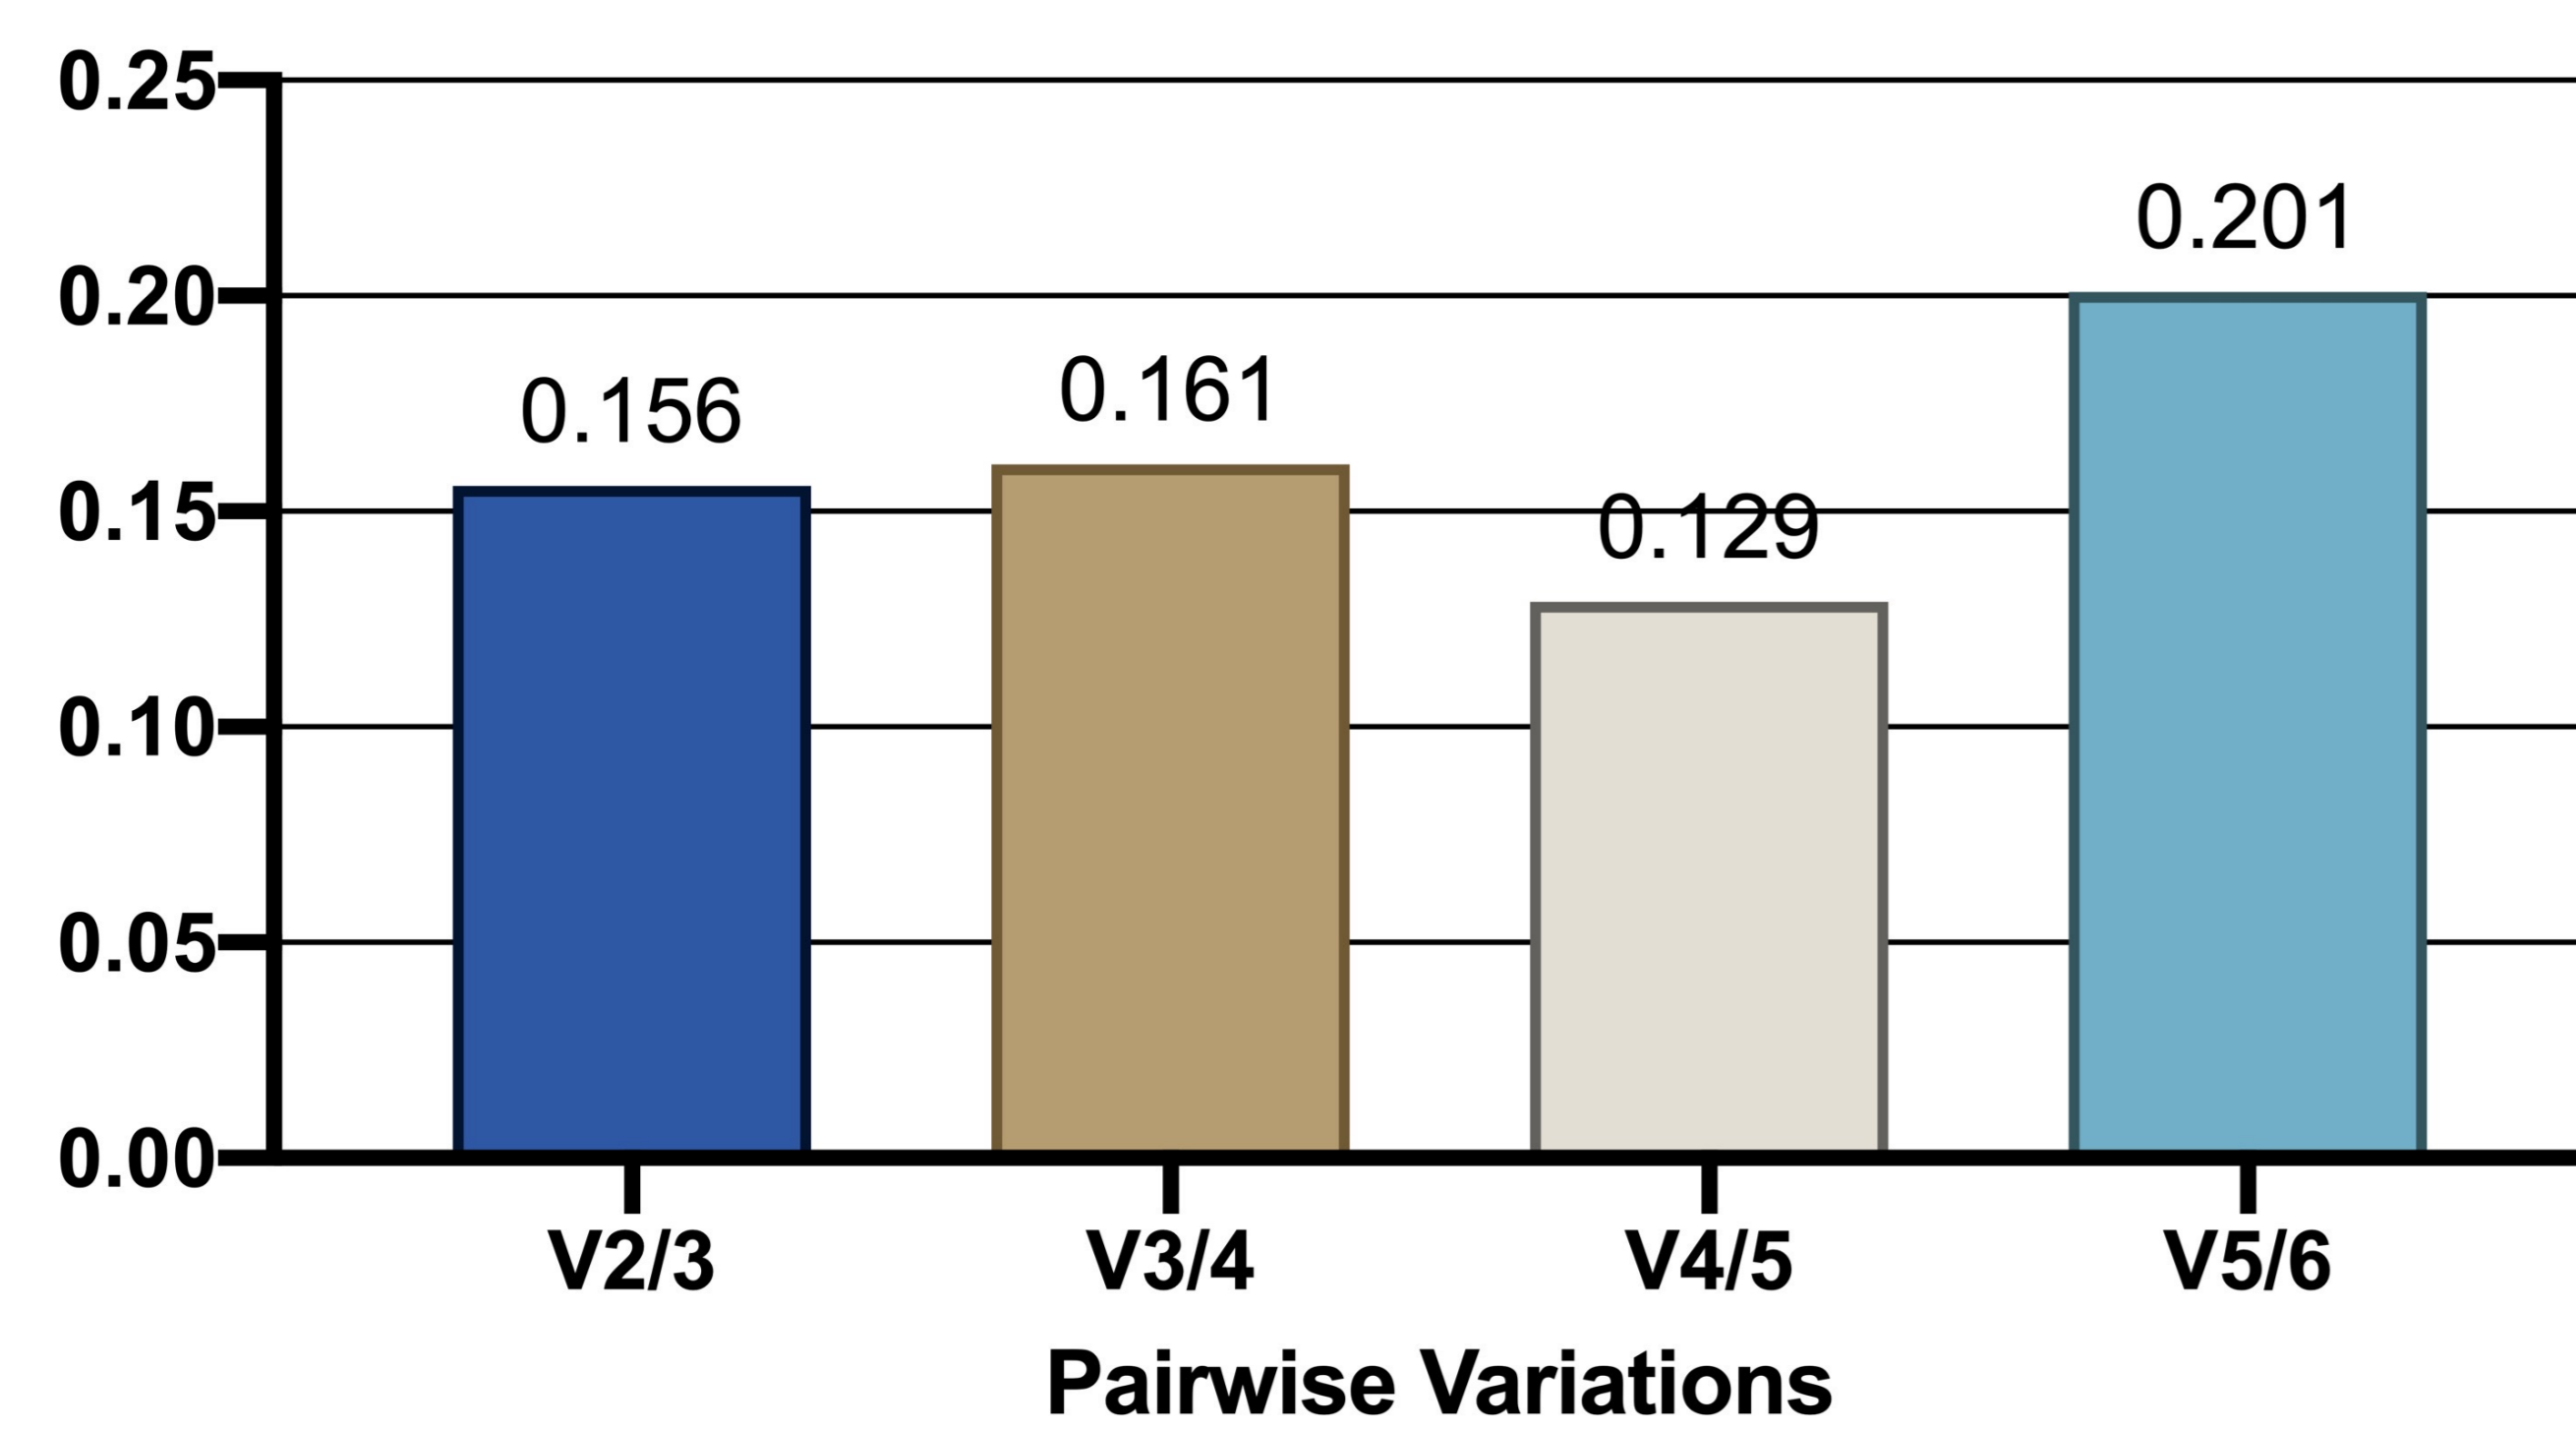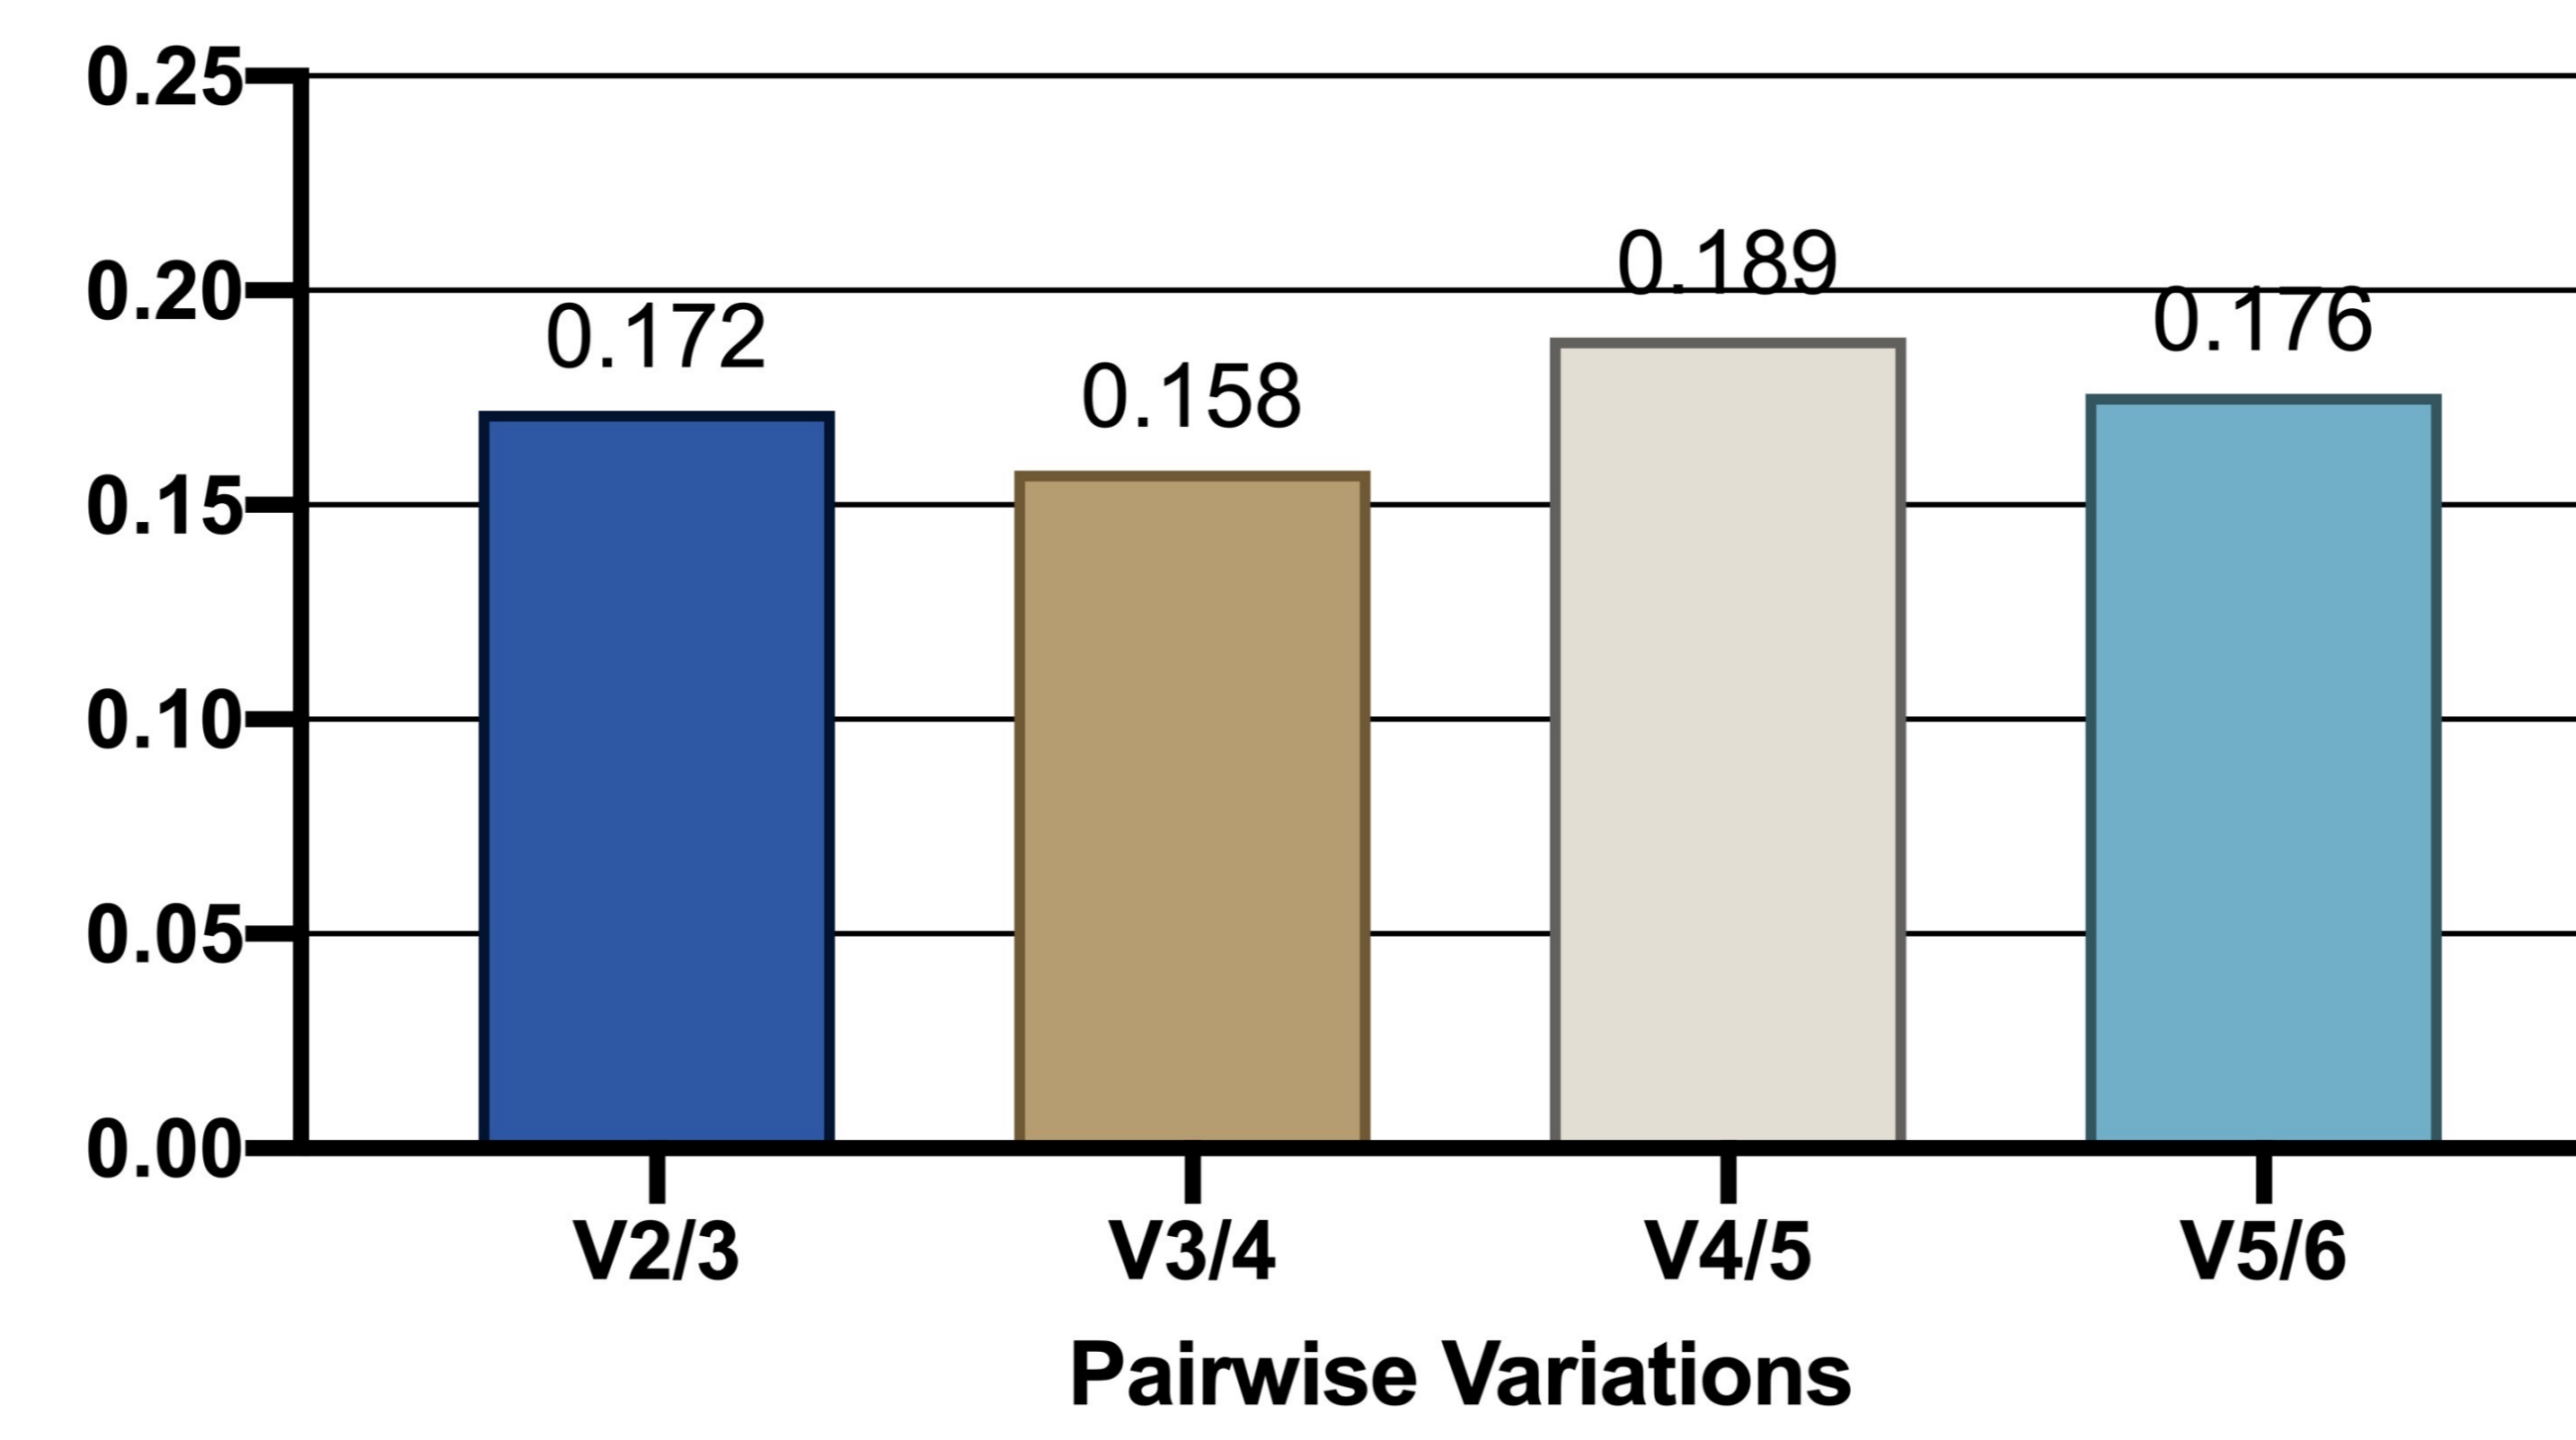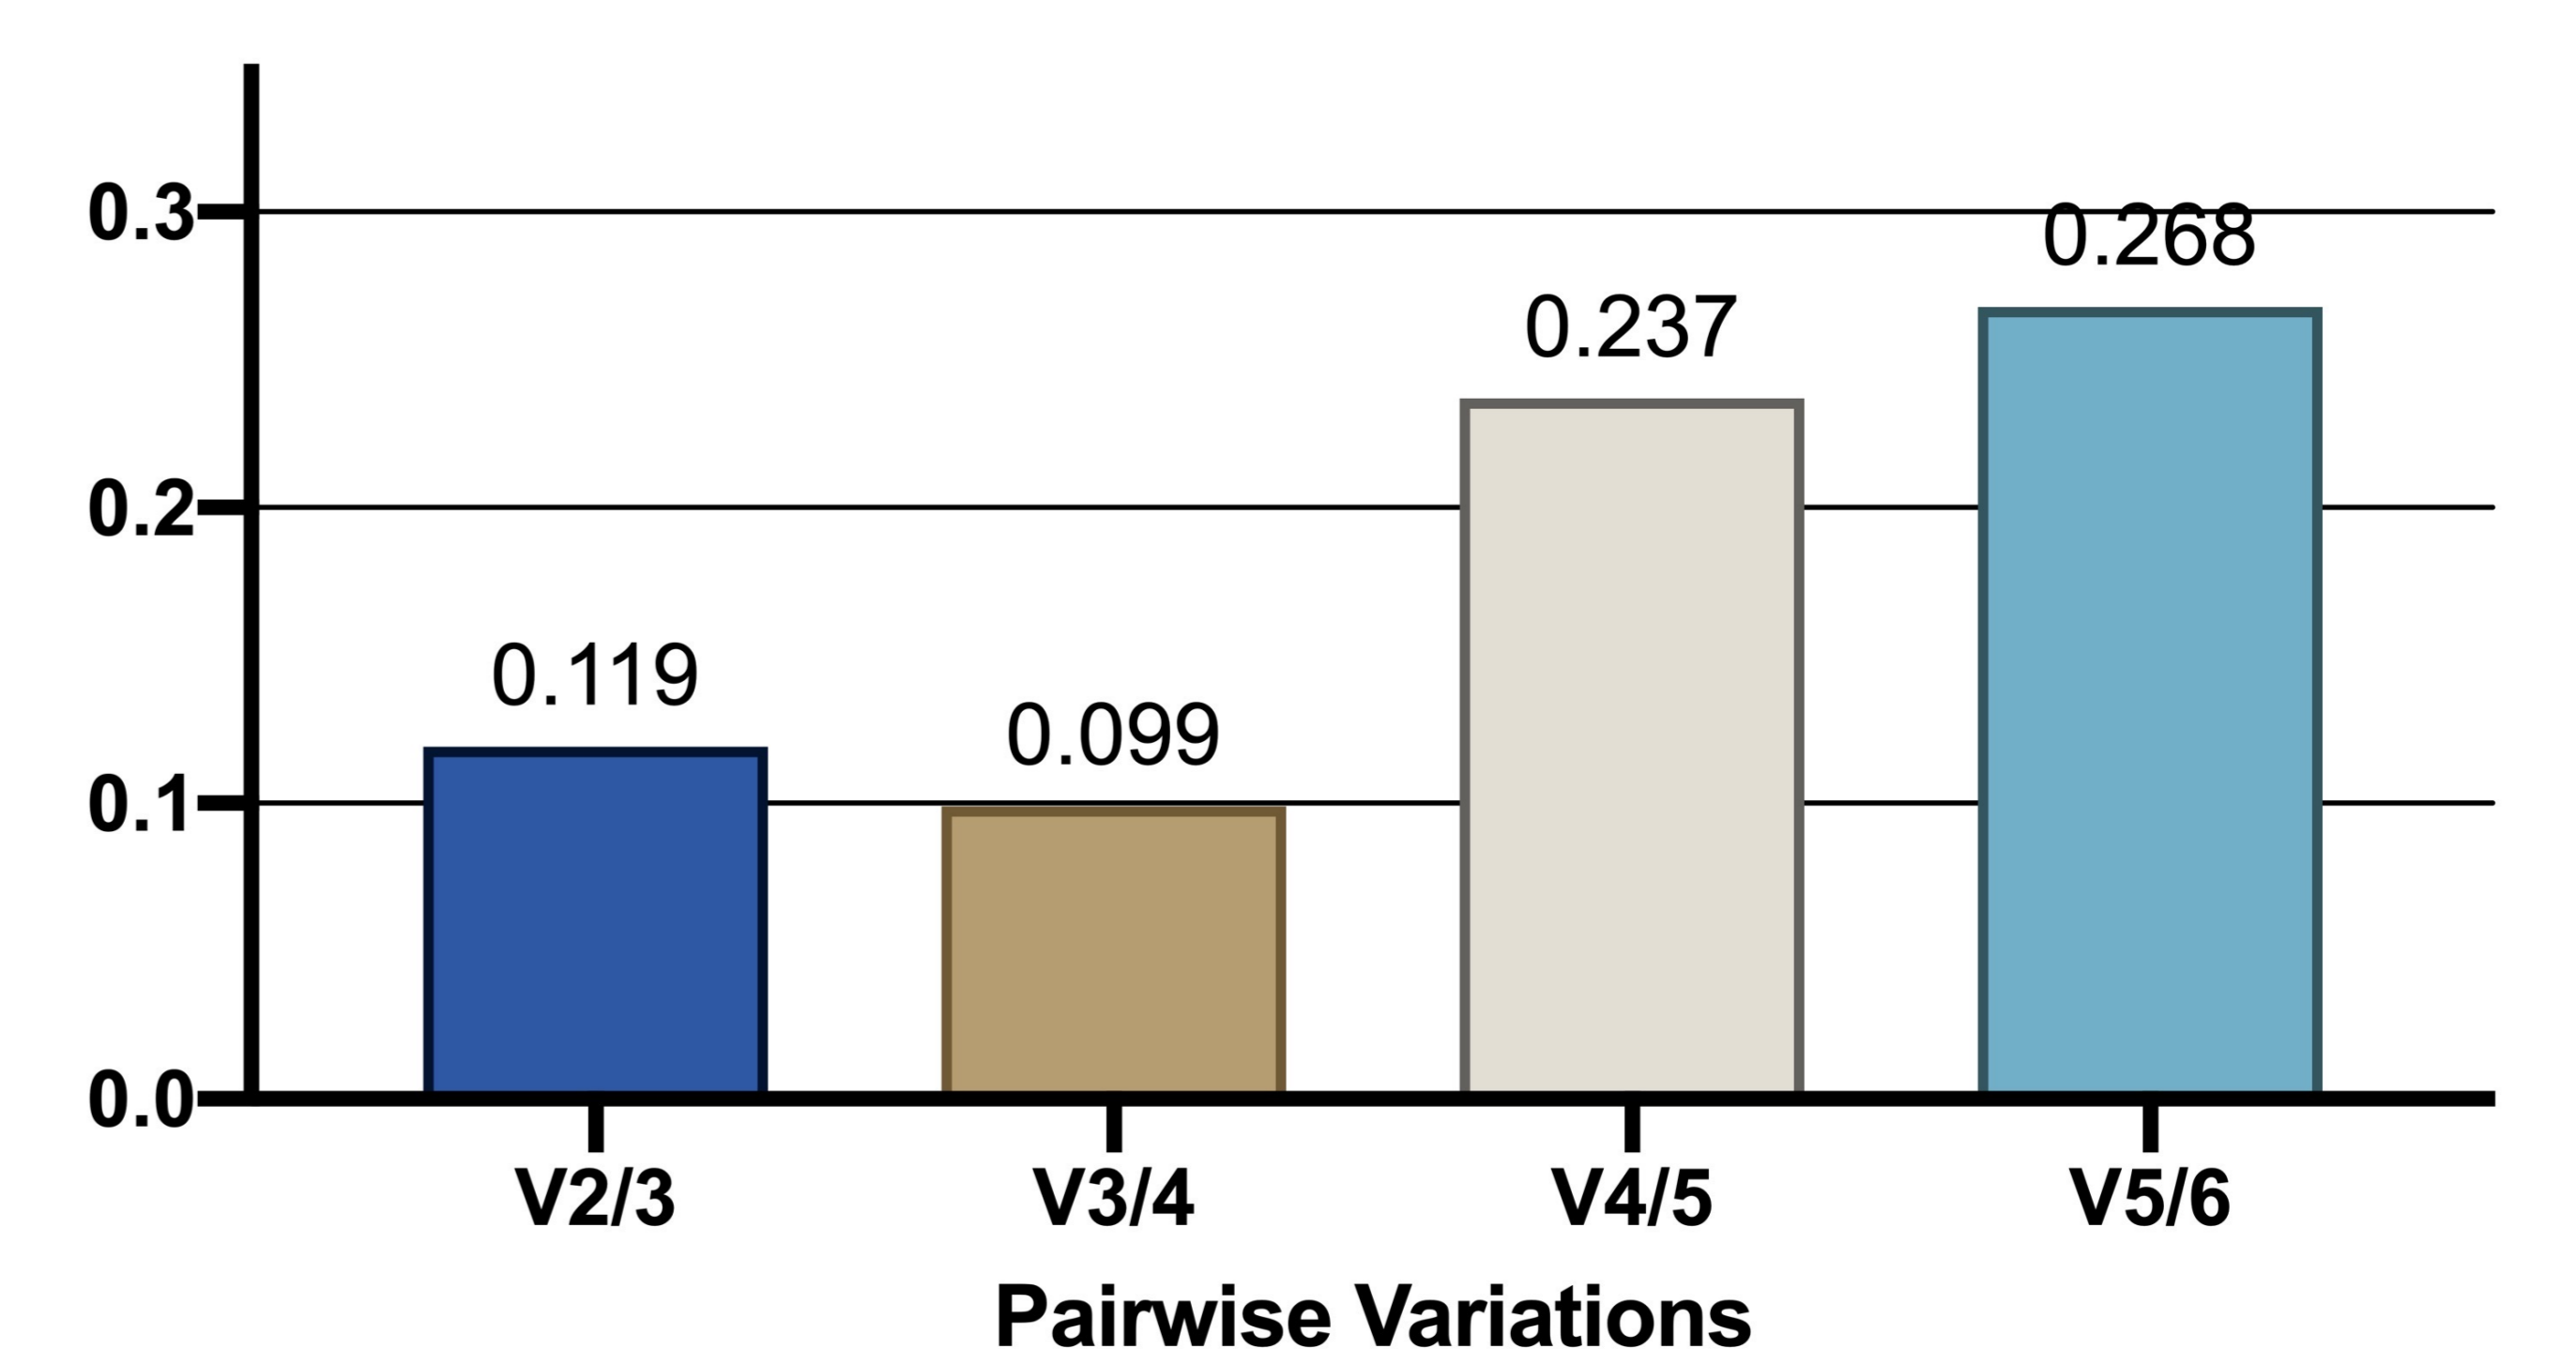

Supplement: JCMM-26-3060-s003.pdf [file JCMM-26-3060-s003.pdf]
