# Supplementary material for: Identification of optimal reference genes for gene expression studies in a focal cerebral ischaemia model—Spatiotemporal effects
Source: PubMed Central journal article supplement (PMC9097850; doi:10.1111/jcmm.17284), 2022-04-22

SHAM

tMCAO

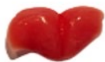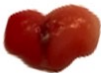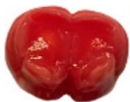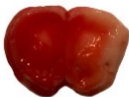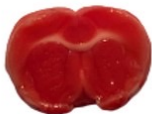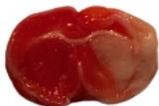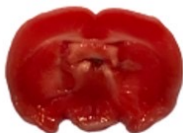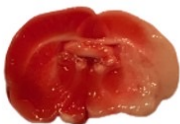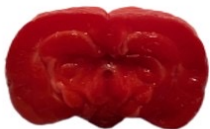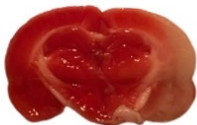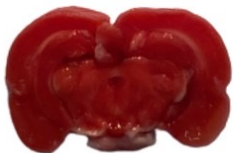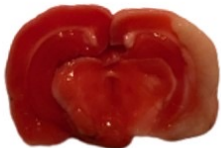

Supplement: JCMM-26-3060-s004.pdf [file JCMM-26-3060-s004.pdf]
